1  
2 **Post-transcriptional regulation of adult CNS axonal regeneration by Cpeb1**

3  
4 Wilson Pak-Kin Lou<sup>1\*</sup>, Alvaro Mateos<sup>1\*</sup>, Marta Koch<sup>2\*</sup>, Stefan Klussman<sup>1</sup>, Chao Yang<sup>5</sup>, Na Lu<sup>5</sup>  
5 Stefanie Limpert<sup>1</sup>, Manuel Göpferich<sup>1</sup>, Marlen Zschaetzsch<sup>2</sup>, Carlos Maillou<sup>4</sup>, Elena Senis<sup>3</sup>, Dirk Grimm<sup>3</sup>,  
6 Raul Mendez<sup>4</sup>, Kai Liu<sup>5,6</sup>, Bassem A. Hassan<sup>2,7,§</sup> and Ana Martin-Villalba<sup>1§</sup>  
7

8 <sup>1</sup>Division of molecular biology, German Cancer Research Center, Heidelberg, Germany; <sup>2</sup> VIB Center for  
9 the Biology of Disease and Center for Human Genetics, VIB and KU Leuven, Leuven, Belgium; <sup>3</sup> Virus  
10 host interaction, Heidelberg University Hospital, Center for Infectious Diseases/Virology, Cluster of  
11 Excellence CellNetworks, BioQuant, Germany; <sup>4</sup>Translational control of cell cycle and differentiation,  
12 Institute for Research in Biomedicine, Barcelona, Spain; <sup>5</sup>Division of Life Science, State Key Laboratory  
13 of Molecular Neuroscience, and <sup>6</sup>Center of Systems Biology and Human Health, School of Science and  
14 Institute for Advanced Study, The Hong Kong University of Science and Technology, Hong Kong, China;  
15 <sup>7</sup>Sorbonne Universités, UPMC Univ Paris 06, Inserm, CNRS, Institut du Cerveau et de la Moelle  
16 epiniere (ICM) - Hôpital Pitié-Salpêtrière, Paris, France

17 \* *These authors contributed equally*

18 § Correspondence should be addressed to AMV and BAH

19  
20 **ABSTRACT**

21  
22 Adult mammalian CNS neurons are unable to regenerate following axonal injury, leading to permanent  
23 functional impairments. Yet, the reasons underlying this regeneration failure are not fully understood.  
24 Here, we study the transcriptome and proteome shortly after spinal cord injury. Profiling of the total  
25 and ribosome-bound RNA in injured and naïve spinal cords identify a substantial post-transcriptional  
26 regulation of gene expression. In particular, transcripts associated with nervous system development  
27 were downregulated in the total RNA-fraction while remaining stably loaded onto ribosomes.  
28 Interestingly, motif association analysis of post-transcriptionally regulated transcripts identified the  
29 cytoplasmic polyadenylation element (CPE) as enriched in a subset of these transcripts that was more  
30 resistant to injury-induced reduction at transcriptome level. Modulation of these transcripts by  
31 overexpression of the CPE binding protein, Cpeb1, in mouse and Drosophila CNS neurons promoted  
32 axonal regeneration following injury. Our study uncovers a global conserved post-transcriptional  
33 mechanism enhancing regeneration of injured CNS axons.  
34

35 **INTRODUCTION**

36  
37 Axons of the adult mammalian CNS have a very limited regenerative capacity following injury. Extrinsic  
38 factors with inhibitory effect on regeneration have received a great deal of attention, and many  
39 molecules have been identified (Filbin, 2006). However, the limited success obtained by strategies  
40 based on neutralizing inhibiting signals within the immediate environment of an injured axon (Côté et  
41 al., 2011; Young, 2014), has recently turned the attention to cell intrinsic factors involved in positive  
42 and negative modulation of the regenerative response (Liu et al., 2011; Mar et al., 2014).  
43

44 Early in 1913 Santiago Ramón y Cajal already described that besides the weak and sterile end of  
45 axotomized axons set to degenerate, there are active axonal ends, capable of sprouting, for which he  
46 termed “bud” or “club of growth”, due to their analogy to the growth cones of embryonic axons (Cajal  
47 et al., 1991). Interestingly, formation of sprouts at the axonal tip of axotomized dorsal root ganglion  
48 (DRG) neurons is accompanied by increased expression of regeneration-associated genes (Ylera et al.,  
49 2009). Successful regrowth of central DRG axons as induced by a preconditioning peripheral lesion  
50 requires the assembly of these regenerating terminal bulbs that are observed 5-7 hours following  
51 injury (Ylera et al., 2009). Processes like membrane sealing, regulation of proteolytic processes, RNA  
52 stability and local translation are major determinants of successful assembly of a regenerating axonal  
53 terminal. Therefore, injured CNS axons do attempt to regrow in the early post-injury phases but  
54 ultimately fail to do so. Consistent with this it has been shown that intrinsic pro-regenerative response  
55 has to be stimulated before the onset of overt inflammatory response and scar formation (Bradke et  
56 al., 2012). Finally, and despite considerable phylogenetic distance between *Drosophila* and mouse,  
57 many phenomena and mechanisms of CNS development and regeneration are conserved between the  
58 two species (Hoopfer et al., 2006; MacDonald et al., 2006; Song et al., 2012), including the transient  
59 abortive regeneration after CNS injury (Ayaz et al., 2008). This allows application of results from fly  
60 genetics to speed up finding and validation of candidate regulator genes for regeneration in mouse  
61 models

62  
63 Post-transcriptional regulation of gene expression is of particular importance in neurons, as it allows  
64 enhanced spatial and temporal control in locations far removed from the cell soma, such as synapses  
65 and axonal growth cones (Holt and Schuman, 2013; Jung et al., 2012). Indeed, axonal regeneration in  
66 peripheral sensory neurons involves post-transcriptional regulation, with localized translation of  
67 specific transcripts at the tip of the injured axon (Hanz et al., 2003; Perlson et al., 2005; Perry et al.,  
68 2012; Yan et al., 2009; Yudin et al., 2008). Interestingly, stability and local translation at the injured  
69 axon of some of these regeneration-regulating transcripts is mediated via the 3'UTR of the transcripts.  
70 For example, in *C. elegans* adult touch neurons, axotomy induces activation of DLK1 which promotes  
71 stabilization and local translation of CEBP-1 by modifying its 3'UTR, and leads to robust regeneration  
72 (Yan et al., 2009). 3' UTR-localized elements are known to nucleate the formation of  
73 ribonucleoparticle complexes by binding miRNAs and/or RNA-binding proteins, which in turn, through  
74 transport/compartimentalization and regulation of mRNA poly(A) tail length, controls translation and  
75 RNA stability (Weill et al., 2012). Some of these motifs include cytoplasmic polyadenylation element  
76 (CPE), Pumilio binding element (PBE), Musashi binding element (MBE), and AU-rich elements (AREs)  
77 (Charlesworth et al., 2013; von Roretz et al.). CPE is best known for its role in cytoplasmic  
78 polyadenylation, where it regulates the length of the poly(A) tail of the transcripts that contain it and  
79 thus its translation (Ivshina et al., 2014; Weill et al., 2012). CPE-mediated regulation can be complex, as  
80 it could act in conjunction with other cis elements such as PBE, MBE, AREs or miRNA binding elements  
81 whereby the number, arrangement and distance between motifs and availability of their regulators  
82 such as kinases or RBPs have varying effects on transport, stability or translation of the transcript  
83 (Piqué et al., 2008; Weill et al., 2012). In the nervous system, Cpeb1 is known to transport transcripts  
84 to postsynaptic densities in dendrites, where it promotes their translation upon synaptic activity  
85 (Huang et al., 2003; Udagawa et al., 2012; Wu et al., 1998).

86  
87 We reasoned that the early transient regenerative response might offer key insights into the intrinsic  
88 molecular mechanisms that need to be activated for successful regeneration. To this end, we profiled  
89 total and polysome-bound RNA of sham operated (naïve) and acutely-injured spinal cords 9h following

90 injury—a time when infiltration of the spinal cord by inflammatory cells has just started (Letellier et al.,  
91 2010). We find that changes in the two RNA fractions are highly uncoupled, and that uncoupled genes  
92 could successfully predict axonal growth regulators in a *Drosophila* model. Presence of the CPE motif  
93 in some of these transcripts correlated with resistance to injury-induced decrease of transcript  
94 availability. Finally, we show that in a drosophila axonal-injury model and a mouse model of optic  
95 nerve crush-injury, axonal regeneration is enhanced upon Cpeb1 overexpression. This study uncovers  
96 a highly conserved global switch in neurons that increases availability of regeneration-associated-RNA  
97 transcripts and thereby enables axonal regeneration following axotomy.

98

## 99 RESULTS

100

### 101 Transcriptome and translome responses to spinal cord injury are extensively uncoupled

102

103 To study post-transcriptional regulation in the spinal cord during the abortive regeneration phase  
104 following injury, we performed simultaneous profiling of the transcriptome and translome from  
105 injured and naïve mice via translation state array analysis (TSAA). Total and polysome-bound RNAs  
106 were extracted from spinal cord tissues of injured and naïve mice 9 hours after operation (Fig. 1A).  
107 This time point was chosen to be within the transient regenerative phase after spinal cord injury,  
108 thereby allowing sufficient time for transcriptional and translation changes to take place, under  
109 limited immune response conditions (Gadani et al., 2015; Hausmann, 2003; Schwanhäusser et al.,  
110 2011; Trivedi et al., 2006). Spinal cord tissue surrounding the injury site (2.5 cm distal/proximal) was  
111 used for RNA profiling to gain insights into the processes taking place in the proximal and distal axonal  
112 ends affected by the injury. Polysome-bound transcripts were isolated via sucrose gradient  
113 fractionation, and fractions containing RNA bound to two or more ribosomes were collected. Samples  
114 were subsequently hybridized onto Affymetrix microarrays. Total and polysome-bound RNAs were  
115 normalized separately, as polysome-bound RNA is a subset of total RNA and standard microarray  
116 normalization methods that assume equality of distributions of total intensity between arrays could  
117 not be used. Notably, correlation plots between arrays shows low variability between replicates, and  
118 assessment of expression changes by quantitative real-time PCR (qPCR) largely validated the  
119 expression changes obtained from microarray analysis (Fig. S1A-B).

120

121 Since the chosen tissue not only contains the injured neuronal processes, but also other cellular  
122 subtypes, we first analyzed whether the injury would have a major impact on cellular tissue  
123 composition at this early time point. To this end we compared the intensities of probesets mapped to  
124 marker genes for motor neurons and other local neurons, oligodendrocytes, microglia, precursor cells  
125 present in the central canal, and blood-borne cells (see Table S2). The analysis revealed a high  
126 correlation between expression patterns of naïve and injured spinal cord (0.97 and 0.99 Pearson  
127 correlation for total and polysome fraction, respectively), indicating the absence of major changes in  
128 tissue composition upon injury (Fig. S1C). By contrast, a high proportion of probesets in both total and  
129 polysome-bound fractions exhibited significant changes upon injury (Fig. 1B). Importantly, for many  
130 differentially expressed probesets, the changes in total and polysome-bound RNA do not correlate  
131 (Fig. 1B-D, Table S1). A large proportion of changes occur only in the total RNA fraction with no  
132 corresponding changes in the polysome-bound RNA. This agrees with previous observations in which  
133 stress conditions trigger a general shut down of translation to maximize cell survival (Park et al., 2008;  
134 Yamasaki and Anderson, 2008). Differentially regulated genes in the total RNA fraction are similarly  
135 distributed between up- and down-regulation (1B-C). The polysome-bound RNA fraction showed

136 fewer differentially regulated genes than the total RNA fraction, with most of those being down-  
137 regulated (Fig. 1B-C). The difference in numbers of differentially regulated genes between the total  
138 and polysome-bound fractions indicates that the translational response to injury is highly uncoupled  
139 from RNA availability. In addition, many genes displayed opposing directions of regulation, suggesting  
140 considerable influence of post-transcriptional regulation (Fig. 1D).

141

## 142 **Uncoupled genes are functionally clustered and regulate neuronal regeneration**

143

144 To assess the functional role of the observed uncoupling effect, Gene Ontology (GO) (Ashburner et al.,  
145 2011) enrichment analysis was performed and visualized using Cytoscape (Shannon et al., 2003).  
146 Enrichment of up- and down-regulated genes was represented as red and blue nodes respectively. In  
147 the total-RNA fractions, transcript availability of genes related to translation, RNA processing, protein  
148 catabolic processes and protein transport was increased upon injury, but decreased for genes related  
149 to CNS development (Fig. 2A and Table S3). Excitingly, in the polysomal-bound RNA fraction, injury  
150 increased ribosome-loading of genes related to regulation of CNS development, as well as cell death,  
151 transcription, RNA processing and immune response (Fig. 2B and Table S3). Notably, there were no  
152 significantly under-represented categories in the polysome fraction, indicating that the decrease in  
153 translation after injury is a general effect and neither directed nor functionally clustered.

154

155 Different trends of enrichment were observed for many GO categories between the total and  
156 polysome-bound fractions, suggesting that uncoupling serves specific functional purposes. Of  
157 particular note, categories related to CNS development, which are decreased in the total RNA fraction,  
158 remain stable or enriched in ribosomal-loaded transcripts. This might explain the temporary  
159 regeneration observed following injury, which is absent at later stages of the injury response, as  
160 existing transcripts from regenerative genes continue to be translated at first, but are not replaced  
161 upon eventual degradation. To investigate if transcripts exhibiting this highly uncoupled behavior  
162 affect axonal growth, we turned to *Drosophila*. Using the UAS-Gal 4 (Brand and Perrimon, 1993), we  
163 expressed each of a total of 38 candidate uncoupled genes - for which a fly homologue exists and a  
164 UAS line was available - in a fly CNS neuronal population called the small ventral lateral neurons  
165 (sLNvs). Most of the genes tested have reduced transcript availability but stable ribosomal loading in  
166 both naïve and injured spinal cord (Table S1). We find that 19 (50%) of tested candidates influenced  
167 the developmental growth of the sLNv axonal projection: 12 increased outgrowth, while 7 resulted in  
168 shorter sLNv projections (Table 1).

169

## 170 **Association of 3'UTR motifs with attenuated decrease in transcriptome following spinal cord injury**

171

172 Next, we asked whether there are common features shared among the uncoupled transcripts,  
173 especially since the *Drosophila* experiments suggest that such transcripts are enriched for genes  
174 modulating axonal growth. To address this question, we examined the presence of common RNA  
175 features. It has been shown that the 3'UTR harbours a myriad of regulatory motifs that regulates  
176 stability, intracellular localization and translation of its RNA host (Moore, 2005; Szostak and Gebauer,  
177 2013). Many important neuronal mRNAs such as Map2, Bdnf,  $\beta$ -actin and Gap43 are regulated via  
178 their 3'UTRs (Blichenberg et al., 1999; Donnelly et al., 2011; Lau et al., 2010). This prompted us to  
179 investigate the association of 3'UTR motifs in a given transcript with its expression upon injury. Since  
180 this has to be performed on the transcript level, only probe sets mapping to a unique transcript were  
181 used. We investigated the presence of cytoplasmic polyadenylation element (CPE), Pumilio binding

182 element (PBE), Musashi binding element (MBE), Hex (hexanucleotide involved in polyadenylation) and  
183 AU-rich elements (AREs) (Table S4). To investigate differences in expression changes upon injury  
184 relative to motif-free transcripts, we plotted the density curves showing the probability of a data point  
185 to have a given log<sub>2</sub>-fold change, thus reflecting the pattern of distribution of expression of the set of  
186 transcripts of interest (Fig. 3).

187  
188 This analysis revealed that transcripts possessing CPE are associated with resistance to injury-induced  
189 down-regulation, as compared to transcripts devoid of CPE (Fig. 3A). Notably, this association was also  
190 seen for genes related to axon and CNS development GO categories (Fig. 3B). In contrast, presence or  
191 absence of CPE did not influence injury-induced changes on the level of ribosomal-loading (Fig. 3A and  
192 S2A). Likewise, RNA transcripts possessing PBE, MBE, Hex and AREs were also associated with  
193 resistance to injury-induced down-regulation in the total but not in the polysomal RNA fractions (Fig.  
194 S2B-C, S3A-B). CPE and AREs were also found to co-occur in the mouse transcriptome, and this is  
195 associated with resistance to injury-induced down-regulation, suggesting that the two motifs might  
196 function in a synergistic manner (Fig. S3C-D). To ensure that the observed associations are genuine,  
197 the same analysis was performed with the motifs on the 5'UTR or with random motifs. As expected,  
198 this control experiment does not show any significant association (Fig. S4). Taken together, the data  
199 suggest that CPE confers transcript stability against the global decrease induced by spinal cord injury  
200 by increasing RNA stability in conjunction with ARE motifs.

201  
202 Although the 3'UTR-tested motifs are associated with higher resistance to injury-induced down-  
203 regulation, only CPE maintained this association in transcripts included in CNS development, axon  
204 development, and cell morphogenesis GO categories. In addition, CPE-containing genes include  
205 validated promoters of axonal regeneration such as Cebpβ and c-Jun (Fontana et al., 2012; Yan et al.,  
206 2009), which are among the CPE containing transcripts with the highest upregulation upon injury in  
207 the total RNA fraction (Table S1). Together with the fact that Cpeb1 overexpression in *Drosophila*  
208 promoted robust axonal outgrowth of developing sLNvs (Table 1), we chose Cpeb1 for further detailed  
209 investigation.

210  
211 To elucidate whether CPE has a general functional role, GO enrichment studies were performed on the  
212 prevalence of CPE among all protein coding genes of the mouse and fly genomes. Many nervous  
213 system development categories were enriched among CPE containing genes in the mouse genome,  
214 including neuron projection morphogenesis, axonogenesis and axon guidance (Fig. 3C and Table S5).  
215 There were no categories found with an under-representation of CPE. Interestingly, almost all  
216 categories in the mouse genome enriched in CPE-containing genes are also enriched in *Drosophila*,  
217 suggesting a high level of conservation of CPE function between the two species.

### 218 219 **Cpeb1 promotes regeneration following neuronal injury**

220  
221 Our data suggest that CPE-enriched transcripts are temporarily protected from degradation after  
222 injury. Surprisingly, neither Cpeb1 mRNA nor protein levels were changed significantly upon SCI  
223 (although a trend to down-regulation could be observed (Fig. S5)). Whether Cpeb1 is specifically down-  
224 regulated in neurons following SCI could not be assessed due to the lack of a working anti-Cpeb1  
225 antibody for immunohistochemistry. To address the neuronal specific role of CPEB1 in axonal  
226 regeneration, and specifically whether the failure to upregulate Cpeb1 might in part explain the  
227 transient and abortive nature of the regenerative response to injury, we overexpressed the fly



228 homologue of Cpeb1, Orb, exclusively in the sLNvs. Fly brains were dissected and kept in culture as  
229 described (Ayaz et al., 2008; Koch and Hassan, 2012) (see also accompanying manuscript). sLNvs were  
230 mechanically injured and the regenerative response was assessed after four days. The number of  
231 sprouts, regenerated length and distance reached from the lesion point were found to be significantly  
232 increased in neurons overexpressing Orb compared to control flies overexpressing LacZ in the same  
233 set of neurons (Fig. 4A-D).

234  
235 To investigate whether this effect is conserved in mammals too, we turned to a mouse model of optic  
236 crush injury that allows overexpression of Cpeb1 in mouse retinal ganglion cells (RGCs) via infection  
237 with adeno-associated viral (AAV) vectors. Thereafter, regeneration of RGC-axons was assessed  
238 following a crush injury of the optic nerve. Importantly, as in *Drosophila*, over-expression of Cpeb1  
239 enhanced axon regeneration in the mouse optic nerve, as both the number and length of regenerated  
240 axons were higher when measured 2 weeks after injury as compared to AAV-GFP infected control  
241 RGCs (Fig. 5E-F). The number of RGCs in the retina remained constant, indicating that the regenerative  
242 effect is not due to reduced cell death after injury (Fig. 5G-H). To test whether knockout of Cpeb1  
243 produces an opposite effect, we knocked out Cpeb1 in primary cultures of mouse cortical neurons.  
244 Efficient knockout is triggered via AAV-Cre mediated deletion of exon 4 (Fig. S6A), which causes a  
245 frameshift that affects the activation and RNA recognition domains of Cpeb1. Neurons were cultured  
246 in a transwell chamber which specifically allows neurites to grow on the underside of the chamber.  
247 Scraping the lower side of the transwell mimicked a transection-injury. Thereafter, regenerating  
248 neurite on the underside could be examined. Notably, knockout of Cpeb1 was found to reduce the  
249 number and length of regenerated neurites 24 hours after injury (Fig. S6B-C). Together, these data  
250 support the notion that Cpeb1 is an enhancer of regeneration, and that this function is conserved  
251 between mice and *Drosophila*.

252  
253

## 254 DISCUSSION

255  
256 We profiled the responses to spinal cord injury both at transcriptome and translome level, and find  
257 them to be highly uncoupled. A screening of factors showing this uncoupled behaviour in *Drosophila*  
258 sLNvs revealed that 50% of the transcripts being prioritized for translation despite exhibiting reducing  
259 levels following spinal injury modulated axonal growth of developing neurons in the fly. Further, in  
260 silico analysis of these uncoupled-transcript led to identification of the CPE motif as highly conserved  
261 across species in functions including CNS-development. To influence expression of CPE-containing  
262 transcripts we overexpress Cpeb1 in injured *Drosophila* and mammalian neurons. CPEB1 emerged as a  
263 conserved necessary and sufficient activator of neuronal regeneration. The current approach also  
264 illustrates the feasibility of uncovering novel functions of RNA-regulatory proteins by combining  
265 studies in mammalian CNS with screenings in model organism, such as *Drosophila*.

266  
267 The substantial uncoupling between transcription and translation in the injured spinal cord highlights  
268 the importance of post-transcriptional gene regulation in axon regeneration. The finding that the  
269 majority of genes are decreased in polysome-bound RNA agrees with previous observations that  
270 stress conditions trigger a general shut down of translation to maximize cell survival (Park et al., 2008;  
271 Yamasaki and Anderson, 2008). The use of the uncoupled response in RNA regulation as a selection  
272 criteria proved to be more efficient at discovering novel factors influencing axonal growth than  
273 selection based on prior knowledge on their role in neural and neurite development. In addition, the

274 fact that Cpeb1 has a positive role in axonal regeneration and the similar enrichment of CPE in the  
275 genomes of both mouse and *Drosophila*, indicates that the role of Cpeb1 is conserved across species.

276  
277 These findings agree well with the increasing number of studies that report the role of axonal  
278 translation of specific mRNAs for axonal regeneration (Hanz et al., 2003; Perlson et al., 2005; Perry et  
279 al., 2012; Yan et al., 2009; Yudin et al., 2008). In order for localized translation to occur in axons, both  
280 mRNA, as well as translation machinery, such as ribosomes and translation factors (e.g. eIF4E), need to  
281 be present. In the case of mRNAs, it was found that injury triggers substantial changes in the axonal  
282 mRNA repertoire in cortical neuron cultures (Taylor et al., 2009). In an *in vivo* setting, growth cone-  
283 associated mRNAs Gap-43, Nrn1 and ActB are increased in crush-injured regenerating sciatic nerve  
284 axons compared to naïve ones (Kalinski et al., 2015). The same study also reported that the presence  
285 of ribosome components and activated translation factors in sciatic nerve axons is induced by injury. A  
286 preconditioning injury that activates regeneration of secondarily injured DRG axons increases the rate  
287 of incorporation of radioactively labeled amino acids, and selective local axonal application of the  
288 translation inhibitor cycloheximide severely reduces regenerative response (Verma et al., 2005).  
289 Together, this confirms that axonal translation occurs upon injury. Remarkably, the levels of ribosome  
290 components, translation factors and growth cone-associated mRNAs in regenerated transected spinal  
291 cord axons were comparable to those of crush-injured regenerating sciatic axons. This suggests that  
292 increasing axonal protein synthesis of specific mRNAs may just be key to overcome the lack of  
293 regeneration in the CNS (Kalinski et al., 2015).

294  
295 While we identified Cpeb1 as an enhancer of axonal regeneration and CPE to be associated with  
296 expression changes upon spinal cord injury, it is surprising that this occurs in total RNA and not  
297 polysome-bound RNA, since Cpeb1 is best known for its role in cytoplasmic polyadenylation and  
298 translation control. However, Cpeb1 is also associated with a myriad of functions in post-  
299 transcriptional regulation, including alternative polyadenylation, RNA transport, storage and  
300 degradation. Cpeb1 has been shown to transport CPE-containing mRNAs into dendrites in rat  
301 hippocampal neurons, in particular Map2, as ribonucleoprotein (RNP) and in a microtubule-  
302 dependent manner (Huang et al., 2003). In addition, Cpeb1 is present in stress granules and dcp1  
303 bodies, which are subcellular structures for mRNA storage and degradation (Anderson and Kedersha,  
304 2006; Eulalio et al., 2007). Overexpression of Cpeb1 increases the assembly of these structures and  
305 is dependent on its RNA binding domain (Wilczynska et al., 2005). Interestingly, this is not dependent  
306 on the phosphorylation site for activation of Cpeb1 during cytoplasmic polyadenylation. Similarly,  
307 deletion of the phosphorylation site does not alter the distribution of Cpeb1-containing foci within the  
308 dendrites and synapses of *Xenopus* optic tectal neurons, suggesting that the function of Cpeb1 to  
309 transport and target mRNAs to RNP complexes is independent of its role in cytoplasmic  
310 polyadenylation (Bestman and Cline, 2009). Foci containing inactive Cpeb1 mutants located near  
311 synapses do, however, show higher intensities than those containing wild-type Cpeb1, suggesting that  
312 inability to activate translation may trap Cpeb1 and its target mRNA within the RNP complex (Bestman  
313 and Cline, 2009). A possible scenario linking these observations is that inactive Cpeb1 forms RNP  
314 complexes together with the bound mRNA, leading to simultaneous repression of mRNA translation  
315 and protection from degradation while guiding them to the final location. Another scenario involves  
316 regulation of alternative polyadenylation by Cpeb1, thereby recruiting splicing factors to different  
317 polyadenylation sites and generating transcripts of varying 3'UTR lengths (Bava et al., 2013). This  
318 process affects the cis-elements present in the 3'UTR of the transcript (e.g. other RNA binding motifs  
319 or miRNA binding sites), which in turn affects localization, stability and translation efficiency of the

320 transcript (Lianoglou et al., 2013; Mayr and Bartel, 2009).

321 In summary, starting with a global approach our study revealed the role of wide-spread post-  
322 transcriptional regulation in the early injury response in the spinal cord. While translation of mRNAs  
323 related to CNS development appears to be prioritized in the acute phase after injury, limitation in their  
324 transcript availability likely leads to the eventual failure in regeneration. By focusing on genes that  
325 exhibit uncoupling behavior between transcript availability and translation, we identified a number of  
326 genes that modulate outgrowth of axons during development, demonstrating that this as a viable  
327 method to identify neuronal intrinsic regulators of regeneration. We have also found the association  
328 of 3'UTR motifs with CNS injury response, and identified Cpeb1 as a modulator of axon regrowth,  
329 possibly by increasing the availability of development-related transcripts.

330

## 331 **METHODS**

332

### 333 **Mouse experiments**

334

#### 335 **Spinal cord injury**

336

337 Female C57BL/N mice of 10 weeks of age were used for the spinal cord injury. Animals were bred in  
338 house at the DKFZ Center for Preclinical Research Facility and housed under standard conditions.

339 Animals were subjected to laminectomy and then an 80% transectional spinal cord injury by cutting  
340 the spinal cord with irridectomy scissors. Naïve mice were subjected only to laminectomy. Nine hours  
341 after the operation, 2.5 cm of spinal cord tissue centering on the lesion site was extracted. Procedures  
342 were conducted in accordance with the DKFZ guidelines and approved by the Regierungspräsident  
343 Karlsruhe.

344

#### 345 **Translation state array analysis (TSAA)**

346

347 RNA was isolated from the chosen tissue and segregated into a total RNA fraction and a polysome-  
348 bound RNA fraction. Polysome-bound RNA was isolated via fractionation in sucrose gradient as  
349 previously described (Lou et al., 2014), with fractions containing RNA bound to two or more  
350 ribosomes collected.

351

352 The samples were profiled with Affymetrix arrays (model Mouse430\_a2) with RNA input amounts of 5  
353 µg and 3µg for total and polysome-bound RNA respectively. Array data is accessible from GEO  
354 (GSE92657). Array data corresponding to each fraction were normalized separately, as polysome-  
355 bound RNA is a subset of total RNA and standard microarray normalization methods that assume  
356 equality of distributions of total intensity between arrays could not be used.

357

358 Normalization was performed using the vsn method as implemented in the vsnrma function from the  
359 R/bioconductor package vsn (Huber et al., 2002). Its.quantile=0.5 was used to allow for robust  
360 normalization when many genes are differentially expressed. Differential expression was calculated  
361 using limma (Smyth, 2004) from R/bioconductor at the level of probesets, the parameter "trend" was  
362 set to TRUE for the empirical moderation of standard errors. Probesets with Benjamini-Hochberg  
363 false-discovery rates (FDR) <0.05 were considered as differentially expressed. Probesets were then  
364 translated to Ensembl gene IDs (Ensembl v72; [www.ensembl.org](http://www.ensembl.org)), and those mapping to multiple IDs  
365 were excluded from subsequent analysis. For cell marker analysis normalised microarray intensities



366 were averaged over replicates. The expression values for 103 measured marker genes were used to  
367 show the composition of samples.

### 368 369 **Gene Ontology enrichment**

370  
371 Enrichment analysis of GO biological process categories between up- and down-regulated genes were  
372 performed separately for each of the RNA fractions. To this end, up-regulated genes were compared  
373 against a background of all differentially expressed genes with the hypergeometric distribution, using  
374 GOstats (Falcon and Gentleman, 2007) and annotation from the org.Mm.eg.db v2.14.0 package, both  
375 from R/bioconductor. Under-representation of up-regulated genes in a category is equivalent to  
376 having an enrichment of down-regulated genes, and is displayed as such.

377  
378 For the enrichment study of CPE in the mouse and fly genomes, GO annotations from annotation  
379 packages org.Mm.eg.db v2.14.0 and org.Dm.eg.db v2.14.0 with experimental evidence code (i.e. EXP,  
380 IDA, IPI, IMP, IGI, IEP) were used. The selectiveness is because GO annotations are based on different  
381 kinds of evidence including homology, and circularity would occur when comparing results from two  
382 different genomes with homology included. To prevent artificially inflating the number of motifs when  
383 genes have more than one transcript with common 3'UTR, we performed the enrichment analysis at  
384 the level of genes. Transcripts with annotation of transcript biotype as protein coding were translated  
385 to Ensembl gene ID and then to Entrez. Genes with only CPE-containing transcripts were compared  
386 against all genes (excluding those with both CPE-containing and CPE-free transcripts) with the  
387 hypergeometric distribution using GOstats.

388  
389 Results from the enrichment analyses were visualized using Cytoscape v3.0.2 (Shannon et al., 2003).  
390 Results were represented on the GO subnetworks comprising of categories significant in at least one  
391 of the comparisons (Benjamini-Hochberg FDR  $<1e-4$  for Fig. 2 and  $<1e-5$  for Fig. 3C), with each node  
392 referring to one GO category. Color represents the direction of enrichment, and the intensity of color  
393 and size of the node represent significance (Benjamini-Hochberg BH FDR  $>0.05$  is depicted as white).

### 394 395 **UTR motif analysis**

396  
397 The UTR sequences from transcripts belonging to genes with Ensembl annotation as known and  
398 protein coding were obtained from Ensembl v72 and searched for regular expressions representing  
399 motifs. Sequences used for each motif (Piqué et al., 2008; Spasic et al., 2012; Tian et al., 2005) are  
400 listed in Table S4.

401  
402 Probesets were translated to Ensembl transcript ID (Ensembl v72), and only probesets mapping a  
403 unique transcript were used. Distributions of  $\log_2$  (fold change) were compared using the  
404 Kolmogorov-Smirnov test in R (<http://cran.rproject.org/>). To represent the expression change profiles  
405 for transcripts from specific GO categories, we used GO annotation at the level of transcript  
406 downloaded from Ensembl v72 with the R/Bioconductor package biomaRt.

### 407 408 **Optic nerve crush injury**

409  
410 Experimental procedures were performed in compliance with animal protocols approved by the  
411 Animal and Plant Care Facility at the Hong Kong University of Science and Technology. C57BL/6 mice of

412 5-6 weeks of age were anesthetized with ketamine (80 mg/kg) and xylazine (10 mg/kg) and received  
413 Meloxicam (1 mg/kg) as analgesia after the surgery. AAV2 vectors expressing either Cpeb1 or Gfp  
414 under the neuron-specific human synapsin promoter were injected into the vitreous bodies with a  
415 Hamilton microsyringe. Five weeks after vector injection, the optic nerve was gently exposed  
416 intraorbitally and crushed with jeweler's forceps (Dumont #5; Fine Science Tools) around 1 mm behind  
417 the optic disk. Mice were kept for 2 weeks after injury before tracing. To visualize RGC axons in the  
418 optic nerve, 1.5  $\mu$ L cholera toxin  $\beta$  subunit conjugated with Alexa555 (CTB555, 2  $\mu$ g/ $\mu$ L, Invitrogen)  
419 were injected into the vitreous bodies. Two days after the CTB injection, animals were sacrificed by  
420 transcardial perfusion for histology examination. In each mouse, the completeness of optic nerve  
421 crush was verified by showing that anterograde tracing did not reach the superior colliculi.

422

### 423 **Immunofluorescence staining of retina and optic nerve and quantifications**

424

425 Eyes and optic nerves were cryosectioned and examined under an epifluorescence (Nikon, TE2000) or  
426 confocal microscope (Zeiss, LSM Meta710). Total numbers of RGCs were determined by whole-mount  
427 retina staining. A mouse anti-Tuj1 antibody (Covance) was used to detect RGCs. Twelve images (3 for  
428 each quarter, covering peripheral to central regions of the retina) from each retina were captured  
429 under a confocal microscope (400X) and Tuj1-positive cells were counted in a blind fashion. To detect  
430 traced axons after optic nerve crush, longitudinal sections of optic nerves were serially collected. To  
431 analyze the extent of axonal regeneration in the optic nerve, the number of axons that passed through  
432 distance  $d$  from the lesion site was estimated using the following formula:  $\sum a_d = \pi r^2 \times$   
433 [average axon numbers per mm/ $t$ ], where  $r$  is equal to half the width of the nerve at the counting site,  
434 the average number of axons per mm is equal to the average of (axon number)/(nerve width) in 4  
435 sections per animal, and  $t$  is equal to the section thickness (8  $\mu$ m). Axons were manually counted in a  
436 blind fashion. Two-tailed Student's t-test was used for the single comparison between two groups. The  
437 rest of the data were analyzed using ANOVA. *Post hoc* comparisons were carried out when a main  
438 effect showed statistical significance.

439

### 440 **Generation and primary culture of Cpeb1 knockout neurons**

441

442 Primary cultures of cortical neurons were prepared from embryos of Cpeb1<sup>flox/flox</sup> mice. Cre-mediated  
443 excision will remove exon 4 of Cpeb1 and cause a frameshift that affects the phosphorylation site for  
444 activation of Cpeb1 as well as its RNA recognition motifs. Cultures were prepared from cortices of  
445 E16.5 embryos. Briefly, dissected cortices were digested with 0.05% trypsin for 15 minutes, triturated  
446 with a fire-polished glass pipette and plated on poly-L-lysine coated surfaces. Neurons were cultured  
447 in HS-MEM (1x MEM (Thermo Fisher), 10% horse serum, 1.2% glucose, 4mM L-glutamine, 1mM  
448 sodium pyruvate, 0.22% NaHCO<sub>3</sub>, 100 U/ml penicillin-streptomycin) and infected with serotype 2 AAV  
449 encoding CAG-Cre at an MOI of  $1 \times 10^5$ . 24 hours later medium was replaced with N2B27-MEM (1x  
450 MEM (Thermo Fisher), 1x N2 supplement, 1x B27 supplement, 0.1% ovalbumin, 0.6% glucose, 2mM L-  
451 glutamine, 1mM sodium pyruvate, 0.22% NaHCO<sub>3</sub>, 100 U/ml penicillin-streptomycin).

452

### 453 **Western blotting**

454

455 Western blotting against Cpeb1 in spinal cord tissues was performed with standard procedures using  
456 an antibody raised in-house by the group of H. Zentgraf. Cell lysates of murine hippocampal HT22  
457 cells transiently over-expressing Cpeb1 were used as positive control.

458

### 459 ***In vitro* regrowth assay**

460

461 Neurons were cultured on Fluoroblok transwell chambers with PET membranes with 3µm pores  
462 (Millipore) that allow extension of neuronal processes to the underside of the membrane while  
463 keeping cell somas on the top. After 7 days in culture, the underside was scraped with sterile cotton  
464 swabs to cut the processes. 24 hours after injury, processes were labeled with addition of 1µM of  
465 Calcein AM (BD Biosciences) to the culture medium and imaged with a Zeiss Cell Observer  
466 epifluorescence microscope. Images were analyzed and traced with a custom wrote macro in ImageJ  
467 in a blind manner. A mixed effects model was used for statistical comparison to account for variability  
468 in various levels of the experimental setup.

### 469 **Drosophila experiments**

#### 470 **Stocks and genetics**

471 *Drosophila melanogaster* stocks were kept on standard cornmeal media. For tissue specific  
472 overexpression of the transgenes, we used the GAL4/UAS system (Brand and Perrimon, 1993). For the  
473 genetic screen in development and after injury, pdf-gal4, uasgfp; pdf-gal4, uas2x egfp/cyo flies were  
474 kept as a stock and used to drive expression of the various candidate genes, or crossed to wild-type  
475 Canton S (CS), in the case of the outgrowth experiments, or to UAS-lacZ, in the case of the injury  
476 experiments. Overexpression stocks were obtained from the Bloomington Stock Centre and the PDF-  
477 Gal4 line was obtained from P. Taghert. All flies were dissected 2-10 days after eclosion.

#### 478 **Drosophila outgrowth and injury assays**

479 To measure axonal outgrowth during development, flies were reared at 25°C and were dissected in  
480 fresh PBS. A minimum of 5 fly brains (10 sLNv projections) per genotype were fixed in 4%  
481 formaldehyde and stained with an anti-GFP antibody (Molecular Probes; 1:500), according to standard  
482 methods (Ayaz et al., 2008). For the axonal regrowth analysis after injury, flies were reared at 18°C (to  
483 minimize developmental effects), and shifted to 25°C one day prior to injury. Whole brain explants on  
484 culture plate inserts were prepared as described (Ayaz et al., 2008; Koch and Hassan, 2012). In brief,  
485 culture plate inserts (Milipore) were coated with laminin and polylysine (BD Biosciences). Fly brains  
486 were carefully dissected out in a sterile Petri dish containing ice cold Schneider's *Drosophila* Medium  
487 (GIBCO), and transferred to one culture plate insert containing culture medium (10 000 U/ml  
488 penicillin, 10 mg/ml streptomycin, 10% Fetal Bovine Serum and 10 µg/ml insulin in Schneider's  
489 *Drosophila* Medium (GIBCO). sLNv axonal injury was performed using an ultrasonic microchisel  
490 controlled by a powered device (Eppendorf) as described (Ayaz et al., 2008; Koch and Hassan,  
491 2012) and dishes were kept in a humidified incubator at 25°C. Four days later, cultured brains were  
492 fixed and immunohistochemical staining was performed as for freshly dissected samples.

#### 493 **Imaging, morphometric measurements and statistics**

494 For the outgrowth experiments, brains were visualized under a fluorescent microscope equipped with  
495 a GFP filter and classified as having "increased outgrowth", "reduced outgrowth" or "no observable  
496 effect" according to comparison of sLNv length with that of controls.

497 For the injury experiments, de novo growth was assessed four days after injury by measuring injured  
498 sLNv projection that has formed at least one new axonal sprout of a minimum length of 12µm. The  
499 exact injury location was accessed by comparison with axonal projection length at 5 hours (where no  
500 de novo growth has occurred). Imaging was performed on a Zeiss 500 or 700 confocal microscope and  
501 analyzed with Image J. Regenerated length was defined as the de novo axon lengths using the manual  
502 tracing tool. Projected distance was defined as the displacement of the axon sprouts from the lesion  
503 site, measured in a straight line. All images were analyzed in a blind manner. Statistical comparisons  
504 were performed with two-tailed student's t-test.

## 505 **ACKNOWLEDGMENTS**

506  
507 We thank Thomas Hielscher, Axel Benner, Tim Holland-Letz and Simone Braun from the DKFZ  
508 Biostatistics Division for statistical advice; Ha Nati from the University of Heidelberg for help with  
509 Cytoscape; and Damir Krunic from the DKFZ Light Microscope Core Facility for providing the macro for  
510 neuronal process tracing. This study was supported by the German Ministry of Education and  
511 Research (BMBF), the German Cancer Research Center (DKFZ), the Cluster of Excellence CellNetworks  
512 (EXC81), the German Research Foundation (DFG), the Helmholtz Initiative for Synthetic Biology, and  
513 the Hong Kong Research Grants Council 689913, 16101414.

## 516 **AUTHOR CONTRIBUTIONS**

517  
518 WPL performed validation experiments and wrote the manuscript. AM performed bioinformatics  
519 analysis and wrote the manuscript. MK and MZ performed the *Drosophila* experiments. MG  
520 performed bioinformatics analysis. SL and SK performed experiments. ES and DG generated the AAV  
521 vectors. RM and CM provided the transgenic mouse line, antibodies and critical discussion of the data.  
522 CY and NL performed the optic nerve crush injury experiments supervised by KL who also wrote the  
523 manuscript. BH supervised the *Drosophila* part of the study and wrote the manuscript. AMV designed  
524 and supervised the study and wrote the manuscript.

## 527 **REFERENCES**

- 528  
529 Anderson, P., and Kedersha, N. (2006). RNA granules. *J. Cell Biol.* 172, 803–808.  
530 Ashburner, M., Ball, C.A., Blake, J.A., Botstein, D., Butler, H., Cherry, J.M., Davis, A.P., Dolinski, K.,  
531 Dwight, S.S., Eppig, J.T., et al. (2011). The Gene Ontology Consortium. Gene ontology: tool for the  
532 unification of biology. *Nat. Genet.* 25, 25–29.  
533 Ayaz, D., Leyssen, M., Koch, M., Yan, J., Srahna, M., Sheeba, V., Fogle, K.J., Holmes, T.C., and Hassan, B.  
534 a (2008). Axonal injury and regeneration in the adult brain of *Drosophila*. *J. Neurosci.* 28, 6010–6021.  
535 Bava, F.-A., Eliscovich, C., Ferreira, P.G., Miñana, B., Ben-Dov, C., Guigó, R., Valcárcel, J., and Méndez, R.  
536 (2013). CPEB1 coordinates alternative 3'-UTR formation with translational regulation. *Nature* 1–7.  
537 Bestman, J.E., and Cline, H.T. (2009). The Relationship between Dendritic Branch Dynamics and CPEB-  
538 Labeled RNP Granules Captured in Vivo. *Front. Neural Circuits* 3, 1–14.  
539 Blichenberg, a, Schwanke, B., Rehbein, M., Garner, C.C., Richter, D., and Kindler, S. (1999).  
540 Identification of a cis-acting dendritic targeting element in MAP2 mRNAs. *J. Neurosci.* 19, 8818–8829.  
541 Bradke, F., Fawcett, J.W., and Spira, M.E. (2012). Assembly of a new growth cone after axotomy: the

- 542 precursor to axon regeneration. *Nat. Rev. Neurosci.* *13*, 183–193.
- 543 Brand, A.H., and Perrimon, N. (1993). Targeted gene expression as a means of altering cell fates and  
544 generating dominant phenotypes. *Development* *118*, 401–415.
- 545 Cajal, S.R., DeFelipe, J., and Jones, E.G. (1991). *Cajal's Degeneration and Regeneration of the Nervous*  
546 *System* (Oxford University Press).
- 547 Charlesworth, A., Meijer, H.A., and de Moor, C.H. (2013). Specificity factors in cytoplasmic  
548 polyadenylation. *Wiley Interdiscip. Rev. RNA* *4*, 437–461.
- 549 Côté, M.-P., Amin, A.A., Tom, V.J., and Houle, J.D. (2011). Peripheral nerve grafts support regeneration  
550 after spinal cord injury. *Neurotherapeutics* *8*, 294–303.
- 551 Donnelly, C.J., Willis, D.E., Xu, M., Tep, C., Jiang, C., Yoo, S., Schanen, N.C., Kirn-Safran, C.B., van  
552 Minnen, J., English, A., et al. (2011). Limited availability of ZBP1 restricts axonal mRNA localization and  
553 nerve regeneration capacity. *EMBO J.* *30*, 4665–4677.
- 554 Eulalio, A., Behm-Ansmant, I., and Izaurralde, E. (2007). P bodies: at the crossroads of post-  
555 transcriptional pathways. *Nat. Rev. Mol. Cell Biol.* *8*, 9–22.
- 556 Falcon, S., and Gentleman, R. (2007). Using GOstats to test gene lists for GO term association.  
557 *Bioinformatics* *23*, 257–258.
- 558 Filbin, M.T. (2006). Recapitulate development to promote axonal regeneration: good or bad approach?  
559 *Philos. Trans. R. Soc. B Biol. Sci.* *361*, 1565–1574.
- 560 Fontana, X., Hristova, M., Da Costa, C., Patodia, S., Thei, L., Makwana, M., Spencer-Dene, B., Latouche,  
561 M., Mirsky, R., Jessen, K.R., et al. (2012). c-Jun in Schwann cells promotes axonal regeneration and  
562 motoneuron survival via paracrine signaling. *J. Cell Biol.* *198*, 127–141.
- 563 Gadani, S.P., Walsh, J.T., Lukens, J.R., and Kipnis, J. (2015). Dealing with Danger in the CNS: The  
564 Response of the Immune System to Injury. *Neuron* *87*, 47–62.
- 565 Hanz, S., Perlson, E., Willis, D., Zheng, J.Q., Massarwa, R., Huerta, J.J., Koltzenburg, M., Kohler, M., Van-  
566 Minnen, J., Twiss, J.L., et al. (2003). Axoplasmic importins enable retrograde injury signaling in  
567 lesioned nerve. *Neuron* *40*, 1095–1104.
- 568 Hausmann, O.N. (2003). Post-traumatic inflammation following spinal cord injury. *Spinal Cord* *41*, 369–  
569 378.
- 570 Holt, C.E., and Schuman, E.M. (2013). The Central Dogma Decentralized: New Perspectives on RNA  
571 Function and Local Translation in Neurons. *Neuron* *80*, 648–657.
- 572 Hoopfer, E.D., McLaughlin, T., Watts, R.J., Schuldiner, O., O'Leary, D.D.M., and Luo, L. (2006). Wlds  
573 Protection Distinguishes Axon Degeneration following Injury from Naturally Occurring Developmental  
574 Pruning. *Neuron* *50*, 883–895.
- 575 Huang, Y.-S., Carson, J.H., Barbarese, E., and Richter, J.D. (2003). Facilitation of dendritic mRNA  
576 transport by CPEB. *Genes Dev.* *17*, 638–653.
- 577 Huber, W., von Heydebreck, A., Sülzmann, H., Poustka, A., and Vingron, M. (2002). Variance  
578 stabilization applied to microarray data calibration and to the quantification of differential expression.  
579 *Bioinformatics* *18*, S96–S104.
- 580 Ivshina, M., Lasko, P., and Richter, J.D. (2014). Cytoplasmic polyadenylation element binding proteins  
581 in development, health, and disease. *Annu. Rev. Cell Dev. Biol.* *30*, 393–415.
- 582 Jung, H., Yoon, B.C., and Holt, C.E. (2012). Axonal mRNA localization and local protein synthesis in  
583 nervous system assembly, maintenance and repair. *Nat. Rev. Neurosci.* *13*, 308–324.
- 584 Kalinski, A.L., Sachdeva, R., Gomes, C., Lee, S.J., Shah, Z., Houle, J.D., and Twiss, J.L. (2015). mRNAs and  
585 Protein Synthetic Machinery Localize into Regenerating Spinal Cord Axons When They Are Provided a  
586 Substrate That Supports Growth. *J. Neurosci.* *35*, 10357–10370.
- 587 Koch, M.H., and Hassan, B.A. (2012). Out with the Brain: *Drosophila* Whole-Brain Explant Culture. In



588 The Making and Un-Making of Neuronal Circuits in Drosophila, B. a Hassan, ed. (Humana Press), p.  
589 Lau, A.G., Irier, H. a, Gu, J., Tian, D., Ku, L., Liu, G., Xia, M., Fritsch, B., Zheng, J.Q., Dingleline, R., et al.  
590 (2010). Distinct 3'UTRs differentially regulate activity-dependent translation of brain-derived  
591 neurotrophic factor (BDNF). *Proc. Natl. Acad. Sci. U. S. A.* *107*, 15945–15950.  
592 Letellier, E., Kumar, S., Sancho-Martinez, I., Krauth, S., Funke-Kaiser, A., Laudenklos, S., Konecki, K.,  
593 Klussmann, S., Corsini, N.S., Kleber, S., et al. (2010). CD95-ligand on peripheral myeloid cells activates  
594 Syk kinase to trigger their recruitment to the inflammatory site. *Immunity* *32*, 240–252.  
595 Lianoglou, S., Garg, V., Yang, J.L., Leslie, C.S., and Mayr, C. (2013). Ubiquitously transcribed genes use  
596 alternative polyadenylation to achieve tissue-specific expression. *Genes Dev.* *27*, 2380–2396.  
597 Liu, K., Tedeschi, A., Park, K.K., and He, Z. (2011). Neuronal intrinsic mechanisms of axon regeneration.  
598 *Annu. Rev. Neurosci.* *34*, 131–152.  
599 Lou, W.P.-K., Baser, A., Klußmann, S., and Martin-Villalba, A. (2014). In vivo interrogation of central  
600 nervous system translome by polyribosome fractionation. *J. Vis. Exp.*  
601 MacDonald, J.M., Beach, M.G., Porgiglia, E., Sheehan, A.E., Watts, R.J., and Freeman, M.R. (2006). The  
602 Drosophila Cell Corpse Engulfment Receptor Draper Mediates Glial Clearance of Severed Axons.  
603 *Neuron* *50*, 869–881.  
604 Mar, F.M., Bonni, A., and Sousa, M.M. (2014). Cell intrinsic control of axon regeneration. *EMBO Rep.*  
605 *15*, 254–263.  
606 Mayr, C., and Bartel, D.P. (2009). Widespread shortening of 3'UTRs by alternative cleavage and  
607 polyadenylation activates oncogenes in cancer cells. *Cell* *138*, 673–684.  
608 Moore, M.J. (2005). From birth to death: the complex lives of eukaryotic mRNAs. *Science* *309*, 1514–  
609 1518.  
610 Park, K., Liu, K., Hu, Y., and Smith, P. (2008). Promoting axon regeneration in the adult CNS by  
611 modulation of the PTEN/mTOR pathway. *Science* (80- ). *322*, 963–966.  
612 Perlson, E., Hanz, S., Ben-Yaakov, K., Segal-Ruder, Y., Seger, R., and Fainzilber, M. (2005). Vimentin-  
613 dependent spatial translocation of an activated MAP kinase in injured nerve. *Neuron* *45*, 715–726.  
614 Perry, R.B.-T., Doron-Mandel, E., Iavnilovitch, E., Rishal, I., Dagan, S.Y., Tsoory, M., Coppola, G.,  
615 McDonald, M.K., Gomes, C., Geschwind, D.H., et al. (2012). Subcellular knockout of importin  $\beta$   
616 perturbs axonal retrograde signaling. *Neuron* *75*, 294–305.  
617 Piqué, M., López, J.M., Foissac, S., Guigó, R., and Méndez, R. (2008). A combinatorial code for CPE-  
618 mediated translational control. *Cell* *132*, 434–448.  
619 von Roretz, C., Di Marco, S., Mazroui, R., and Gallouzi, I.-E. Turnover of AU-rich-containing mRNAs  
620 during stress: a matter of survival. *Wiley Interdiscip. Rev. RNA* *2*, 336–347.  
621 Schwanhäusser, B., Busse, D., Li, N., Dittmar, G., Schuchhardt, J., Wolf, J., Chen, W., and Selbach, M.  
622 (2011). Global quantification of mammalian gene expression control. *Nature* *473*, 337–342.  
623 Shannon, P., Markiel, A., Ozier, O., Baliga, N.S., Wang, J.T., Ramage, D., Amin, N., Schwikowski, B., and  
624 Ideker, T. (2003). Cytoscape: a software environment for integrated models of biomolecular interaction  
625 networks. *Genome Res.* *13*, 2498–2504.  
626 Smyth, G.K. (2004). Linear Models and Empirical Bayes Methods for Assessing Differential Expression  
627 in Microarray Experiments. *Stat. Appl. Genet. Mol. Biol.* *3*, 1–25.  
628 Song, Y., Ori-McKenney, K.M., Zheng, Y., Han, C., Jan, L.Y., and Jan, Y.N. (2012). Regeneration of  
629 Drosophila sensory neuron axons and dendrites is regulated by the Akt pathway involving Pten and  
630 microRNA bantam. *Genes Dev.* *26*, 1612–1625.  
631 Spasic, M., Friedel, C.C., Schott, J., Kreth, J., Leppek, K., Hofmann, S., Ozgur, S., and Stoecklin, G.  
632 (2012). Genome-wide assessment of AU-rich elements by the AREScore algorithm. *PLoS Genet.* *8*, 1–  
633 16.

- 634 Szostak, E., and Gebauer, F. (2013). Translational control by 3'-UTR-binding proteins. *Brief. Funct.*  
635 *Genomics* *12*, 58–65.
- 636 Taylor, A.M., Berchtold, N.C., Perreau, V.M., Tu, C.H., Li Jeon, N., and Cotman, C.W. (2009). Axonal  
637 mRNA in uninjured and regenerating cortical mammalian axons. *J. Neurosci.* *29*, 4697–4707.
- 638 Tian, B., Hu, J., Zhang, H., and Lutz, C.S. (2005). A large-scale analysis of mRNA polyadenylation of  
639 human and mouse genes. *Nucleic Acids Res.* *33*, 201–212.
- 640 Trivedi, A., Olivas, A.D., and Noble-Haeusslein, L.J. (2006). Inflammation and spinal cord injury:  
641 Infiltrating leukocytes as determinants of injury and repair processes. *Clin. Neurosci. Res.* *6*, 283–292.
- 642 Udagawa, T., Swanger, S. a, Takeuchi, K., Kim, J.H., Nalavadi, V., Shin, J., Lorenz, L.J., Zukin, R.S., Bassell,  
643 G.J., and Richter, J.D. (2012). Bidirectional Control of mRNA Translation and Synaptic Plasticity by the  
644 Cytoplasmic Polyadenylation Complex. *Mol. Cell* *47*, 1–14.
- 645 Verma, P., Chierzi, S., Codd, A.M., Campbell, D.S., Meyer, R.L., Holt, C.E., and Fawcett, J.W. (2005).  
646 Axonal protein synthesis and degradation are necessary for efficient growth cone regeneration. *J.*  
647 *Neurosci.* *25*, 331–342.
- 648 Weill, L., Belloc, E., Bava, F.-A., and Méndez, R. (2012). Translational control by changes in poly(A) tail  
649 length: recycling mRNAs. *Nat. Struct. Mol. Biol.* *19*, 577–585.
- 650 Wilczynska, A., Aigueperse, C., Kress, M., Dautry, F., and Weil, D. (2005). The translational regulator  
651 CPEB1 provides a link between dcp1 bodies and stress granules. *J. Cell Sci.* *118*, 981–992.
- 652 Wu, L., Wells, D., Tay, J., Mendis, D., Abbott, M. a, Barnitt, A., Quinlan, E., Heynen, A., Fallon, J.R., and  
653 Richter, J.D. (1998). CPEB-mediated cytoplasmic polyadenylation and the regulation of experience-  
654 dependent translation of alpha-CaMKII mRNA at synapses. *Neuron* *21*, 1129–1139.
- 655 Yamasaki, S., and Anderson, P. (2008). Reprogramming mRNA translation during stress. *Curr. Opin. Cell*  
656 *Biol.* *20*, 222–226.
- 657 Yan, D., Wu, Z., Chisholm, A.D., and Jin, Y. (2009). The DLK-1 kinase promotes mRNA stability and local  
658 translation in *C. elegans* synapses and axon regeneration. *Cell* *138*, 1005–1018.
- 659 Ylera, B., Ertürk, A., Hellal, F., Nadrigny, F., Hurtado, A., Tahirovic, S., Oudega, M., Kirchhoff, F., and  
660 Bradke, F. (2009). Chronically CNS-injured adult sensory neurons gain regenerative competence upon a  
661 lesion of their peripheral axon. *Curr. Biol.* *19*, 930–936.
- 662 Young, W. (2014). Spinal cord regeneration. *Cell Transplant.* *23*, 573–611.
- 663 Yudin, D., Hanz, S., Yoo, S., Iavnilovitch, E., Willis, D., Gradus, T., Vuppalanchi, D., Segal-Ruder, Y., Ben-  
664 Yaakov, K., Hieda, M., et al. (2008). Localized Regulation of Axonal RanGTPase Controls Retrograde  
665 Injury Signaling in Peripheral Nerve. *Neuron* *59*, 241–252.
- 666  
667

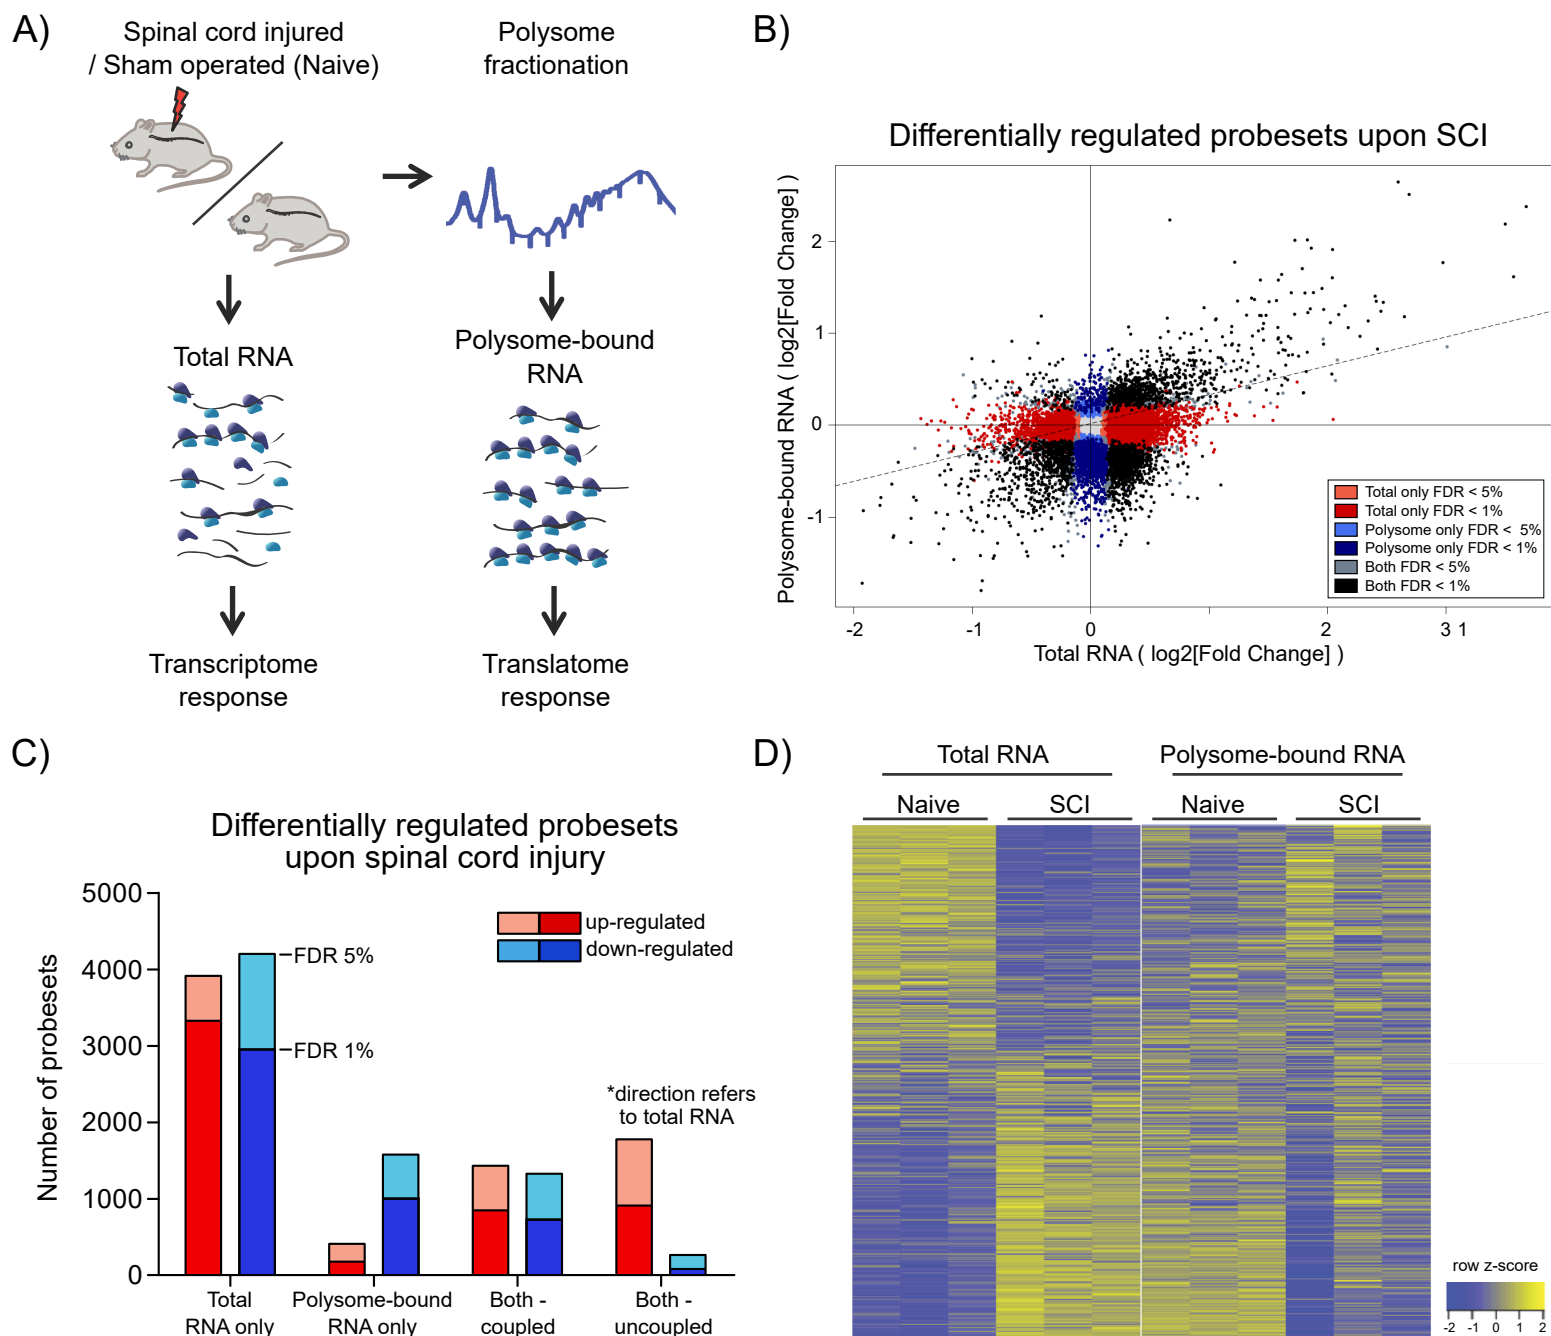

Figure 1: Wide-spread uncoupling of transcriptional and translational responses following spinal cord injury. A) Experimental scheme of simultaneous profile of the transcriptome and translome. Total or polysome-bound RNA fractions were extracted from naive or injured spinal cords and analyzed by RNA microarray. 3 mice were used as biological replicate within each experimental group. B) Scatter plot representation of fold changes of all probesets in total and polysome-bound RNA upon spinal cord injury. C) Number of differentially expressed probesets. D) Heat map representation of probeset expression as z-score in each sample. Each column represents one biological replicate and each row represents expression of one gene across columns. FDR: Benjamini-Hochberg false discover rate.

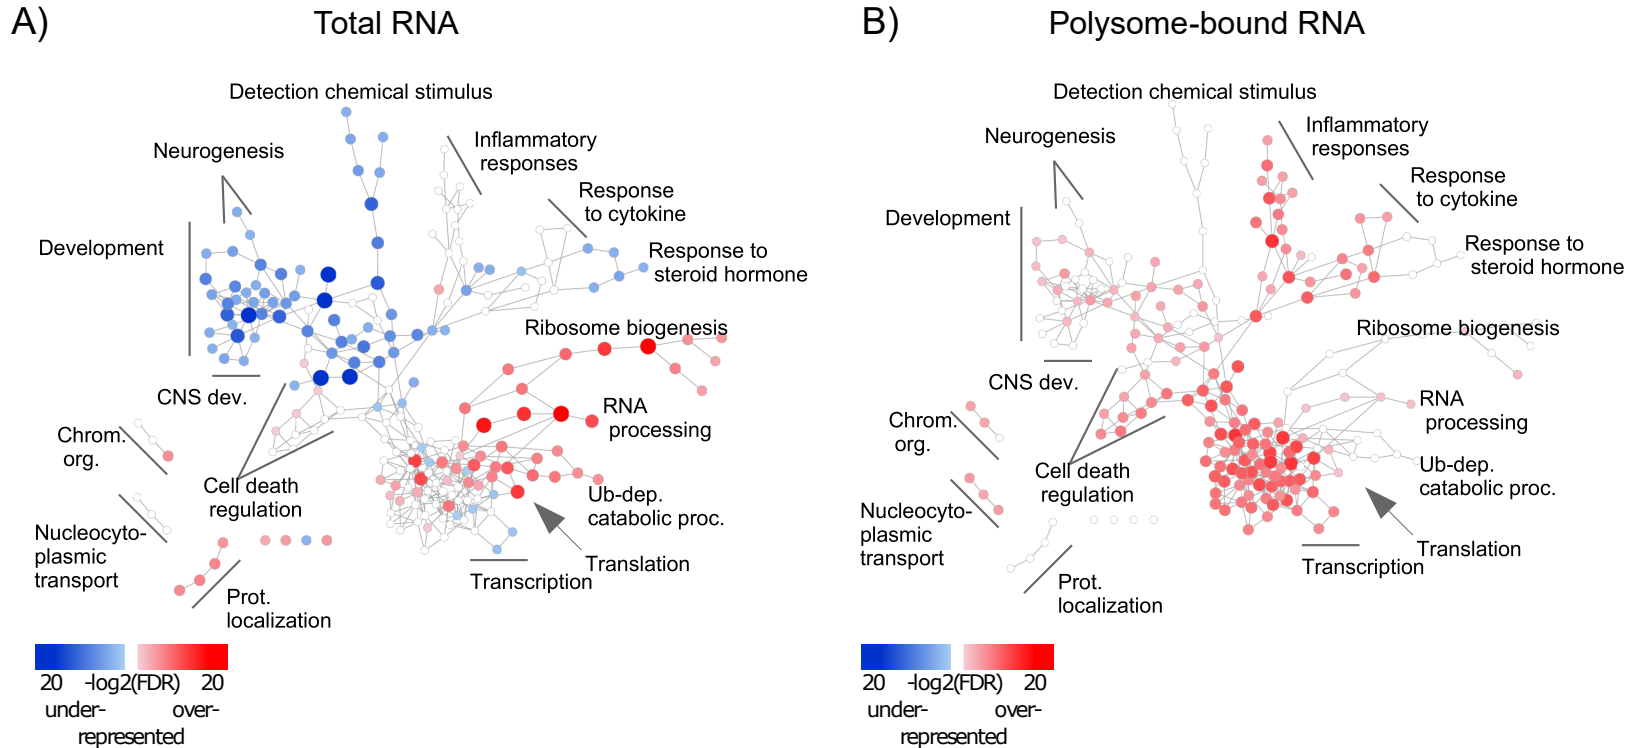

Figure 2: Injury response from total and polysome-bound RNAs is functionally clustered.

Gene Ontology enrichment of differentially regulated genes in A) total and B) polysome-bound RNA fractions, represented as a network of GO categories. Enrichment analysis performed as up-regulated genes against all differentially regulated genes. Under-representation is equivalent to an enrichment of down-regulated genes. Colour intensity and size of the node represent significance by FDR. Only significantly enriched GO categories (FDR < 1e-4) are shown.

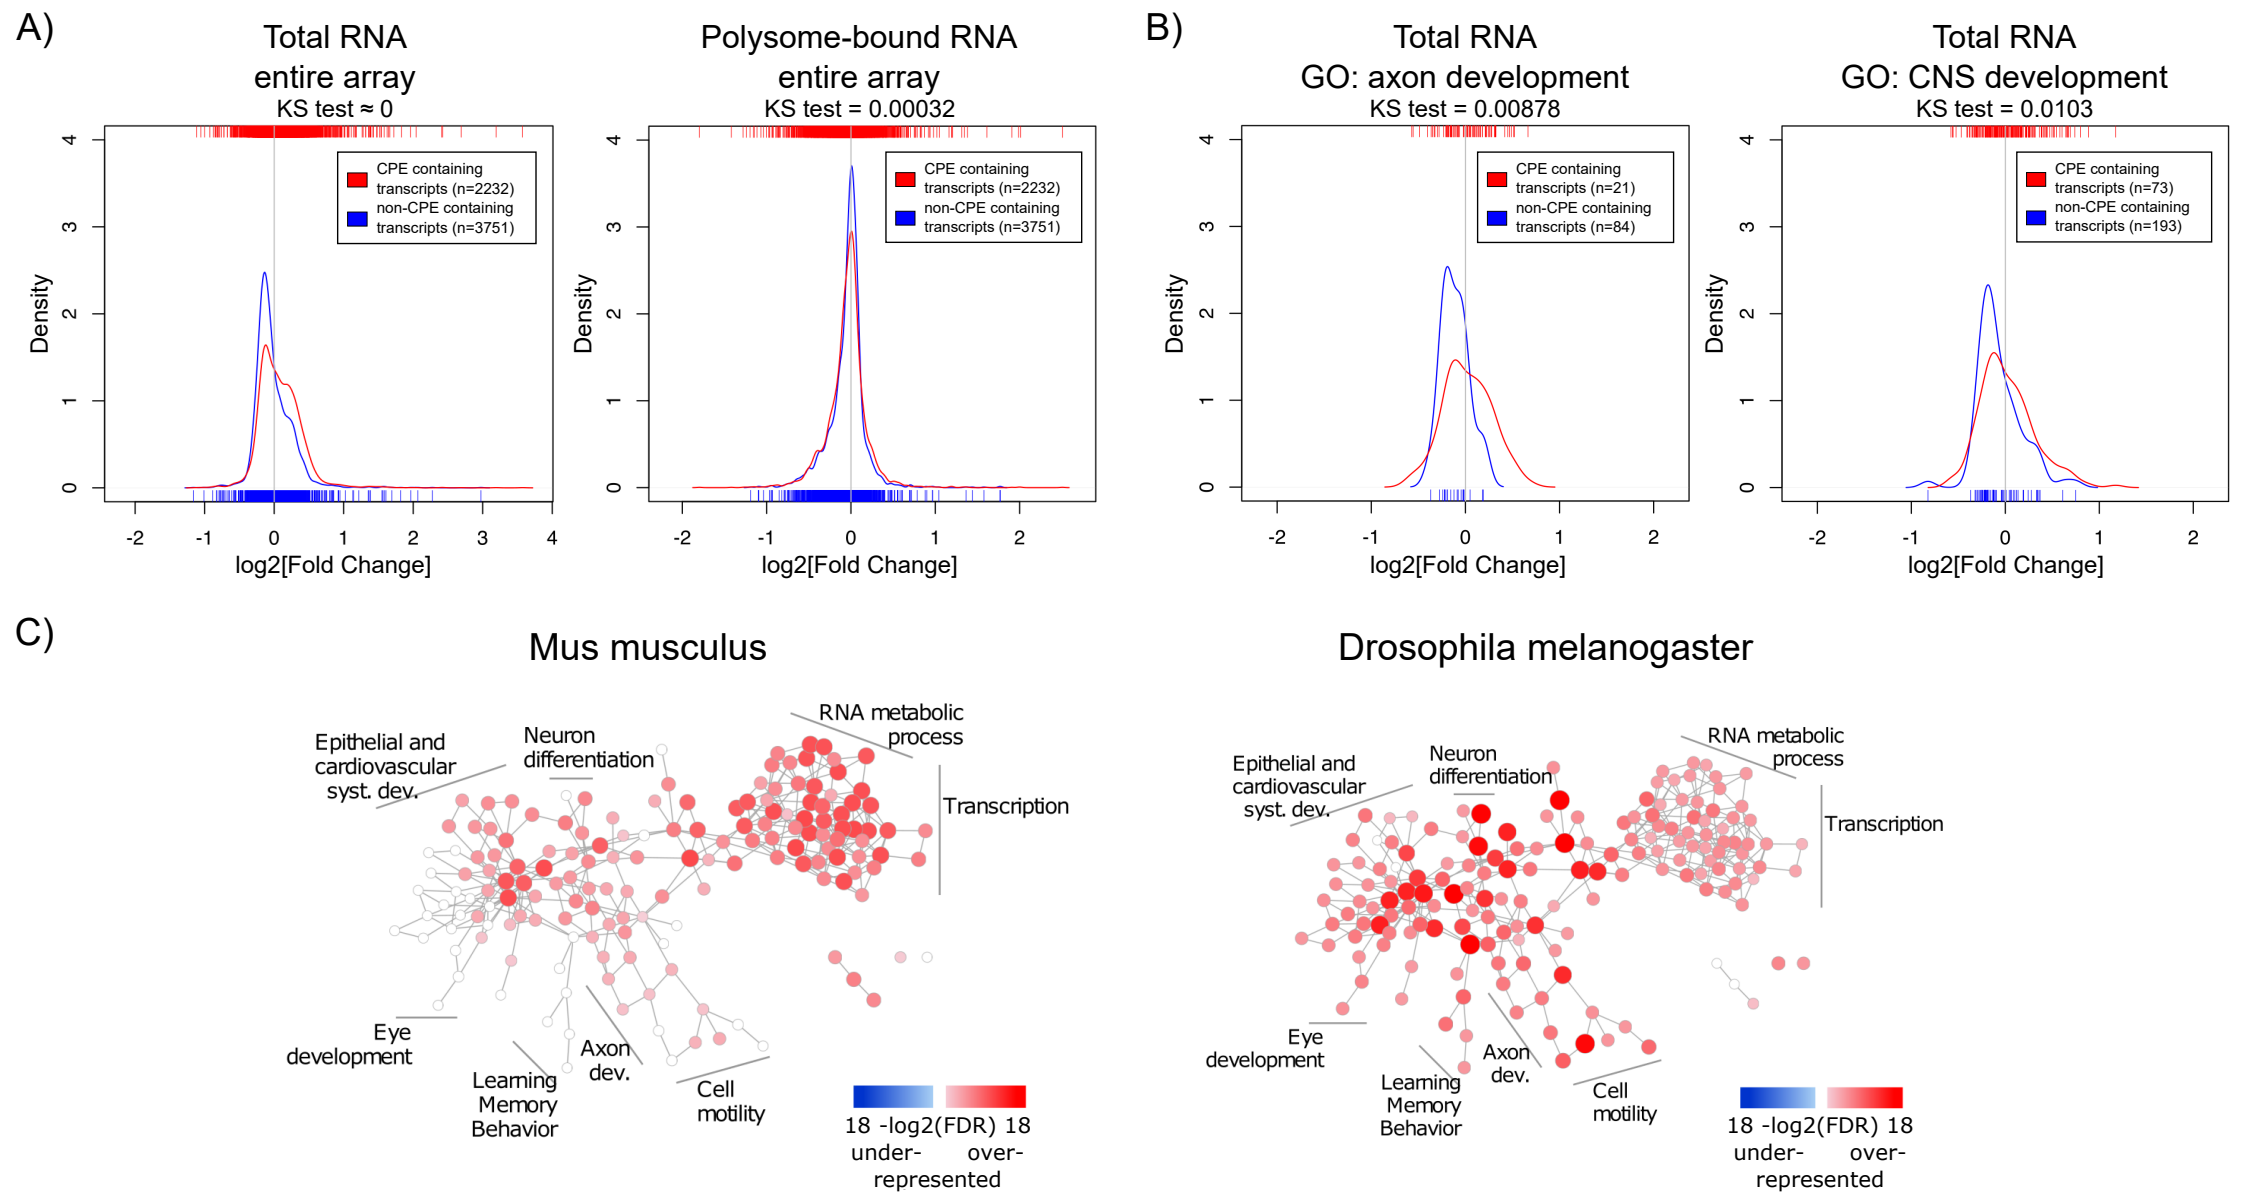

Figure 3: The CPE-motif is enriched in transcripts showing higher positive expression changes following spinal cord injury in the total RNA fraction and whole-genome wide in transcripts related to developmental processes. A-B) Density curves showing the distribution of fold changes (FC) in expression upon injury of CPE-containing and CPE-free transcripts. A) Distribution of FC at the total and polysome-bound RNA level. B) Density curve of FC at the total RNA level of genes associated with GO categories of axon and CNS development. Ticks on top and below the plots represent values of log<sub>2</sub> (fold change) of individual transcripts. Distributions were compared with Kolmogorov-Smirnov test. C) Enrichment of CPE-containing genes in mouse and Drosophila genomes represented as network of GO categories. Intensity of colour and size of node represent level of significance. Only GO categories significant in any of the genomes (FDR < 1e-5) are shown.



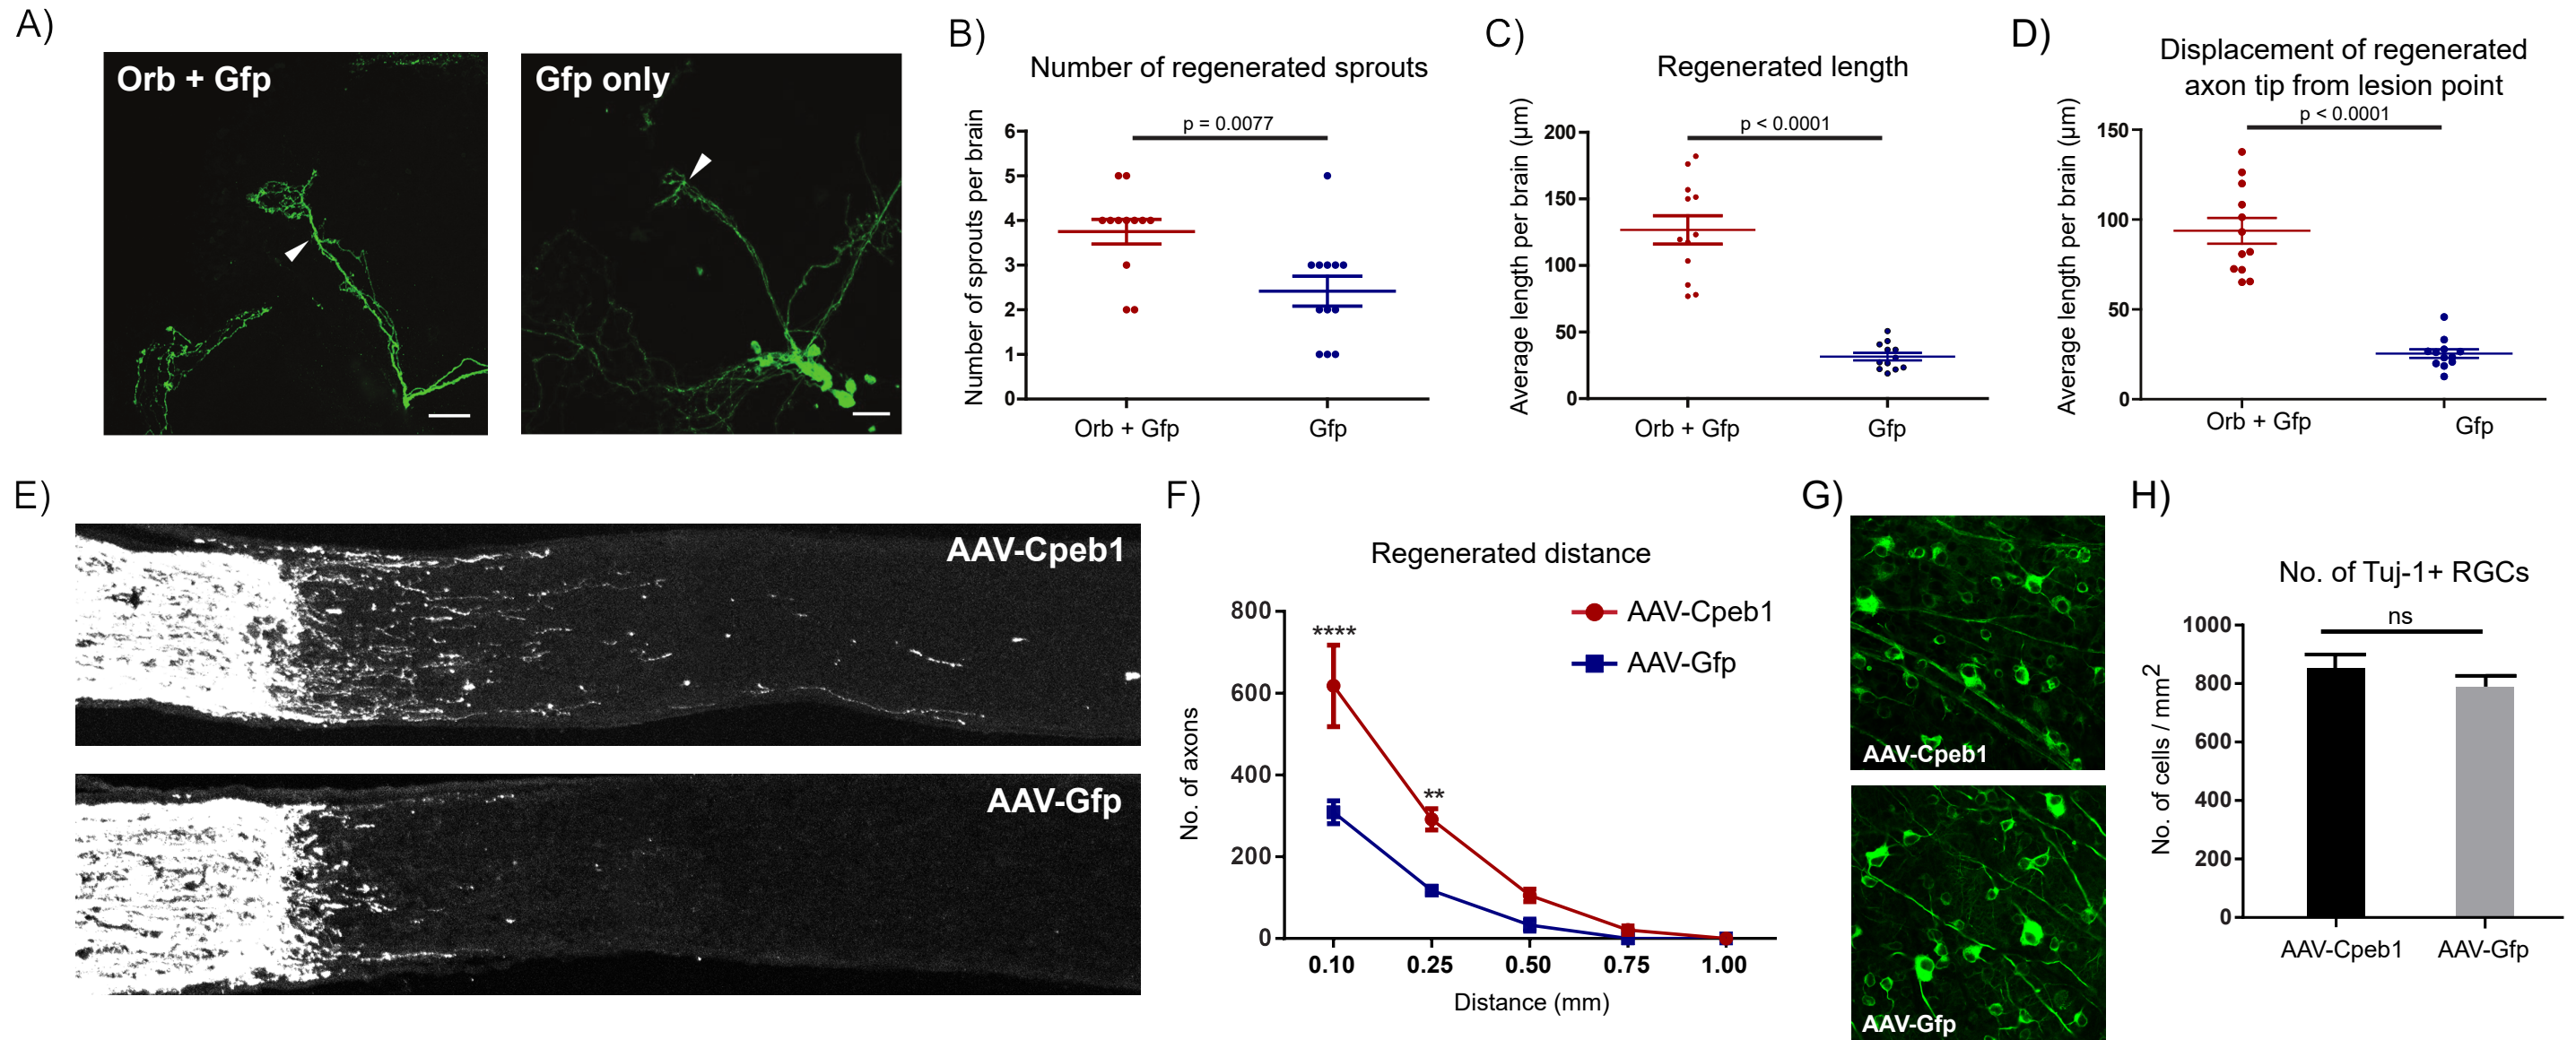

**Figure 4: Cpeb1 overexpression promotes axonal regeneration in the adult mouse and Drosophila CNS.** A-D) Over-expression of Orb (Cpeb1 homolog) enhances axonal regeneration in Drosophila sLNv neurons 4 days after axotomy. A) Representative images. Arrowheads indicate lesion points. Scale bars: 30 μm. B-D) Quantification of number and length of regenerated axon sprouts. Each point represents one brain slice from one fly. n=13 (Orb+Gfp) or 12 (Gfp only) flies. Error bars: mean +/- S.E.M. E-H) Over-expression of Cpeb1 enhances mouse axonal regeneration 2 weeks after a optic nerve crush injury without affecting RGC survival. E-F) Representative images and quantification of traced axons following crush injury. G-H) Shows representative images and quantification of whole-mount staining of Tuj1+ cells in the retina.

| Mouse Gene | Syr Fly Gene | Sy Line       | Axon growth score relative to control                 | Phenotype on axon development |
|------------|--------------|---------------|-------------------------------------------------------|-------------------------------|
| Ankhd1     | mask         | BL15378       | Grade -1                                              | Less growth                   |
| Anp32a     | Mapmodulin   | BL15508       | Grade -1                                              | Less growth                   |
| Atrx       | XNP          | BL17188       | Grade 0                                               | Neutral                       |
| Aurora     | Aur          | BL8377        | Grade +0                                              | Neutral                       |
| Bbx        | bbx          | BL21184       | (early defasciculation)                               | Less growth                   |
| Brd2       | fs(1)h       | BL20194       | Grade +0                                              | Neutral                       |
| Cdc25a     | stg          | BL4778        | Grade +1                                              | More growth                   |
| Chd4       | Mi-2         | BL16876       | Grade 0*                                              | Neutral                       |
| Cpeb1      | Orb          | BL19931 and B | Grade +1                                              | More growth                   |
| Ctcf       | CTCF         | BL21162       | Grade 0                                               | Neutral                       |
| Eif2c2     | AGO1         | BL22486       | Grade 0                                               | Neutral                       |
| Eif3c      | eIF3-S8      | BL20283       | Grade +0                                              | More growth                   |
| Falz       | e(Bx)        | EP(3)637      | Grade 0                                               | Neutral                       |
| Gnrhr      | GRHR         | BL20304       | Grade 0                                               | Neutral                       |
| Kif5b      | Khc          | BL20316       | Grade +0                                              | Neutral                       |
| Lphn1      | Cirl         | BL21398       | Grade -1 (growth); +1 (arborization)                  | Less growth                   |
| Lpin2      | CG8709       | EP(2)2431     | Grade +0                                              | Neutral                       |
| Magi2      | Magi         | BL22093       | Grade 0* (very mild outgrowth)                        | Neutral                       |
| Mll3       | CG5591       | BL16722       | Grade -0 (growth); +0 (arborization)                  | Neutral                       |
| Narg1      | Nat1         | BL16404       | Grade 0                                               | Neutral                       |
| Ncor1      | Smr          | BL21142       | Grade -1                                              | Less growth                   |
| Nedd4      | Nedd4        | BL15289       | Grade 0* (some defasciculation)                       | Neutral                       |
| Nr4a2      | Hr38         | EP769         | Grade 0                                               | Neutral                       |
| Odz1       | Ten-m        | BL19688       | Grade -1                                              | Less growth                   |
| Prkacb     | Pka-C1       | /             | /(Published +1)                                       | More growth                   |
| Rad50      | rad50        | BL8523        | Grade 0* (very mild outgrowth)                        | More growth                   |
| Rbm9       | CG32062      | BL15489       | Grade +0                                              | More growth                   |
| Rest       | crol         | EP(2)2226     | Grade 0                                               | Neutral                       |
| Rhou       | Cdc42        | d49_lab       | Grade +1                                              | More growth                   |
| Sfrs8      | su(wa)       | BL15888       | Grade 0* (very mild outgrowth)                        | More growth                   |
| St13       | CG2947       | BL15347       | Grade -1 (growth); +1 (arborization)                  | Less growth                   |
| Trim       | Brat         | BL22170       | Grade +2                                              | More growth                   |
| Trip12     | CG17735      | BL21989       | Grade 0* (early defasciculation)                      | Neutral                       |
| Txnrd1     | Trxr-1       | BL22439       | most Grade +1                                         | More growth                   |
| Vps35      | CG5625       | BL20913       | Grade 0* (very mild outgrowth; early defasciculation) | Neutral                       |
| Wdfy3      | bchs         | BL15568       | Grade 0                                               | Neutral                       |
| Wnk1       | CG7177)      | BL16970       | Grade +1                                              | More growth                   |
| Ywhaz      | 14-3-3ζ      | BL19919       | Most are grade +1                                     | More growth                   |

#### Phenotype on axon development

|             |    |
|-------------|----|
| More Growth | 12 |
| Less Growth | 7  |
| Neutral     | 19 |
| Total       | 38 |

with phenotype 50.0%

Table 1: List of genes tested in Drosophila axonal outgrowth screening, the observed phenotypes and the corresponding expression changes in microarray

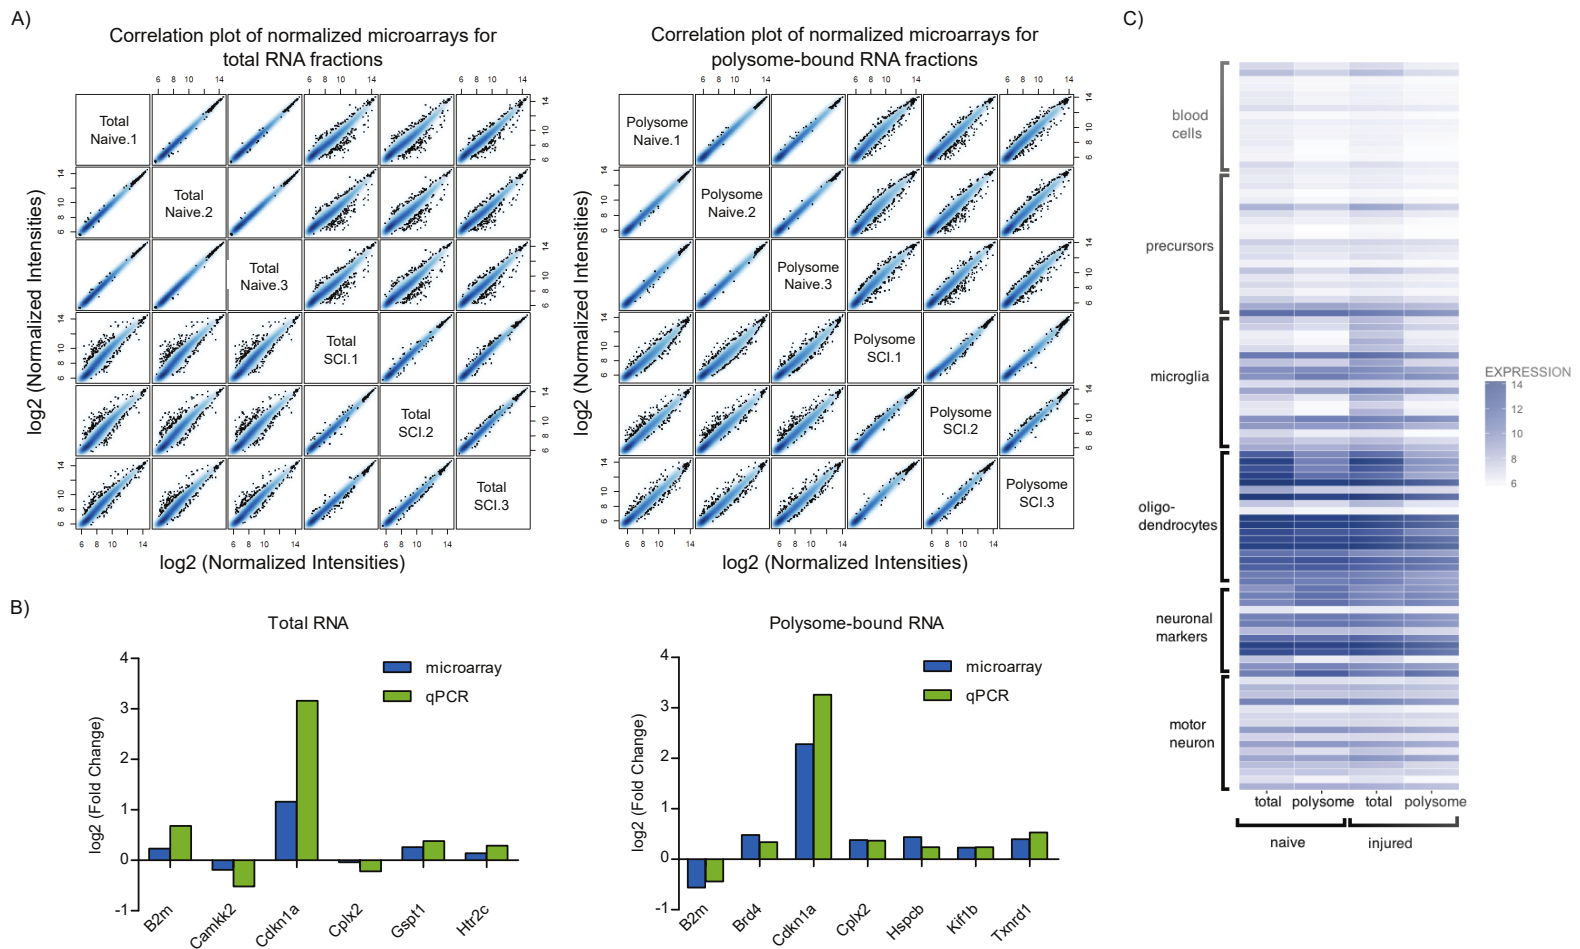

Figure S1: Correlation and validation of microarray.

A) Correlation plot of normalised arrays ( $\log_2$ [normalised intensities]) for total and polysome-bound RNA fractions. B) Comparison of expression changes of selected genes derived from microarray or qPCR. C) Expression patterns of cell-type-specific genes are similar in both, the condition 'naive' and 'injured'. Colours represent normalised intensities of microarray probes mapped to marker genes for motor neurones, other neurones, oligodendrocytes, microglia, precursors, and blood cells. The expression patterns between the conditions 'naive' and 'injured' of these markers show a Pearson's correlation of 0.97 for total RNA and 0.99 for RNA bound to polysomes.

A)

## Polysome-bound RNA

## CPE

bioRxiv preprint doi: <https://doi.org/10.1101/125096>; this version posted April 6, 2017. The copyright holder for this preprint (which was not certified by peer review) is the author/funder, who has granted bioRxiv a license to display the preprint in perpetuity. It is made available under aCC-BY 4.0 International license.

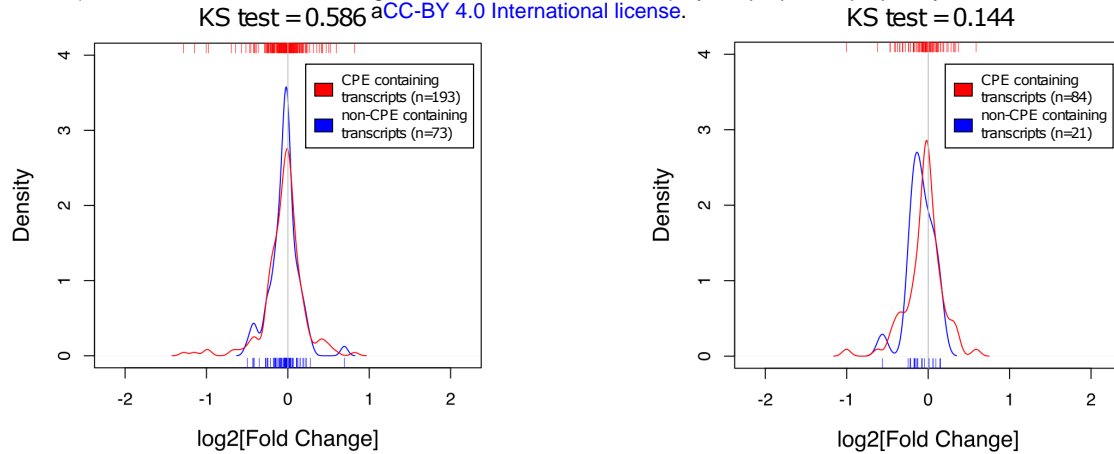

B)

Total RNA  
Other motifs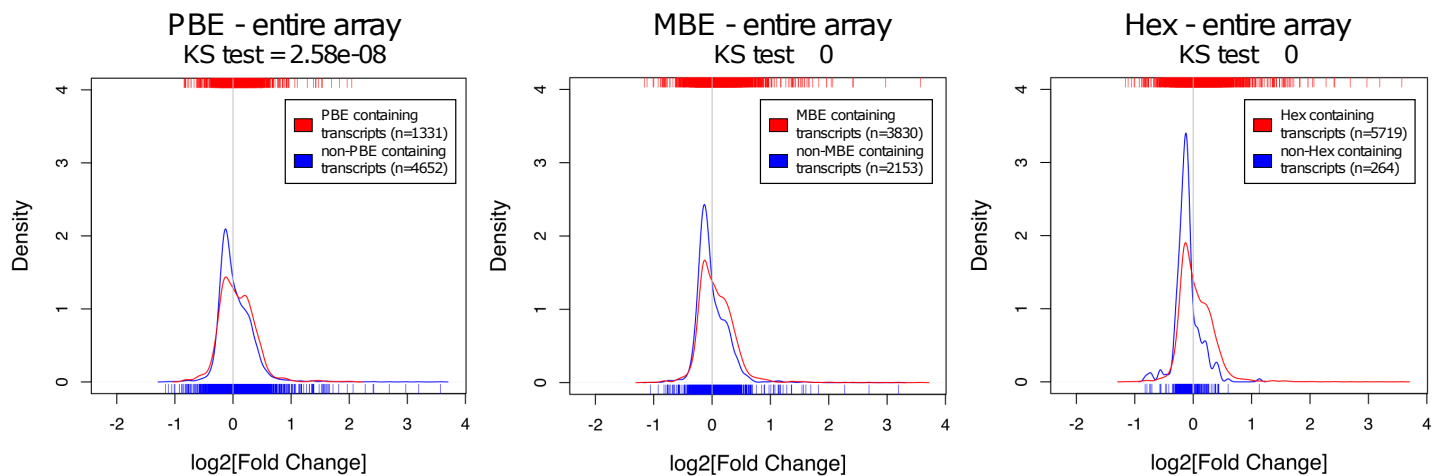

C)

## Polysome-bound RNA

## Other motifs

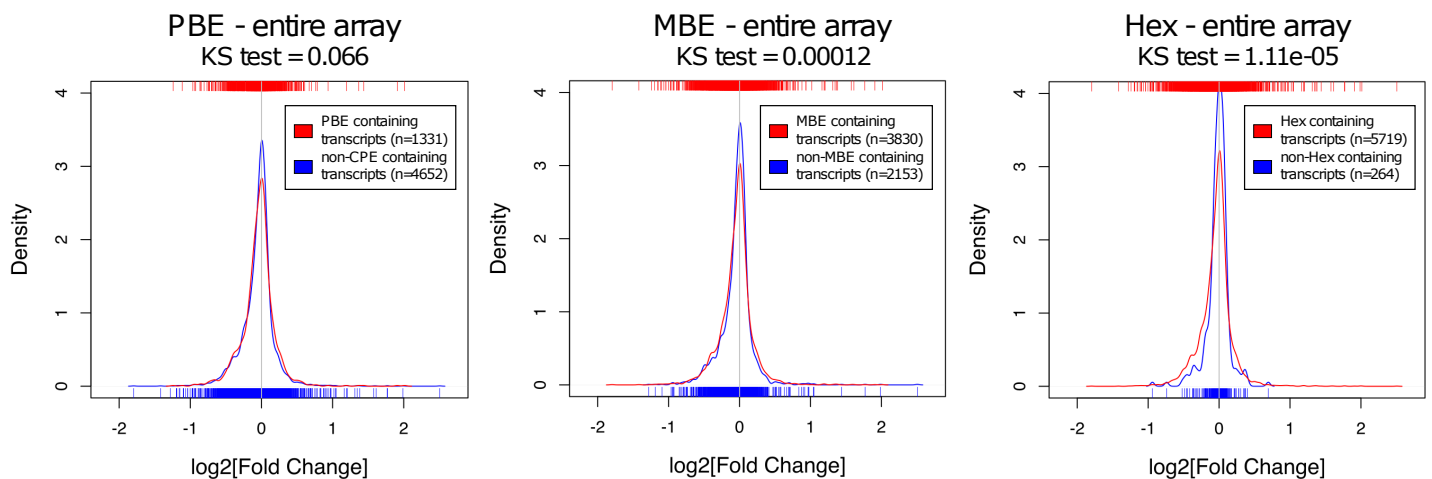

Figure S2: Association of other RNA motifs with expression changes upon SCI.

A) Density curves showing distribution of expression changes in polysome-bound RNA upon SCI of transcripts containing CPE in the 3' UTR. B-C) Density curves of expression changes in total and polysome-bound RNA upon SCI of transcripts separated by the presence of PBE, MBE and Hex in the 3' UTR. Ticks on top and below the plots represent values of log<sub>2</sub> (fold change) of individual transcripts. Distributions were compared with Kolmogorov-Smirnov test.

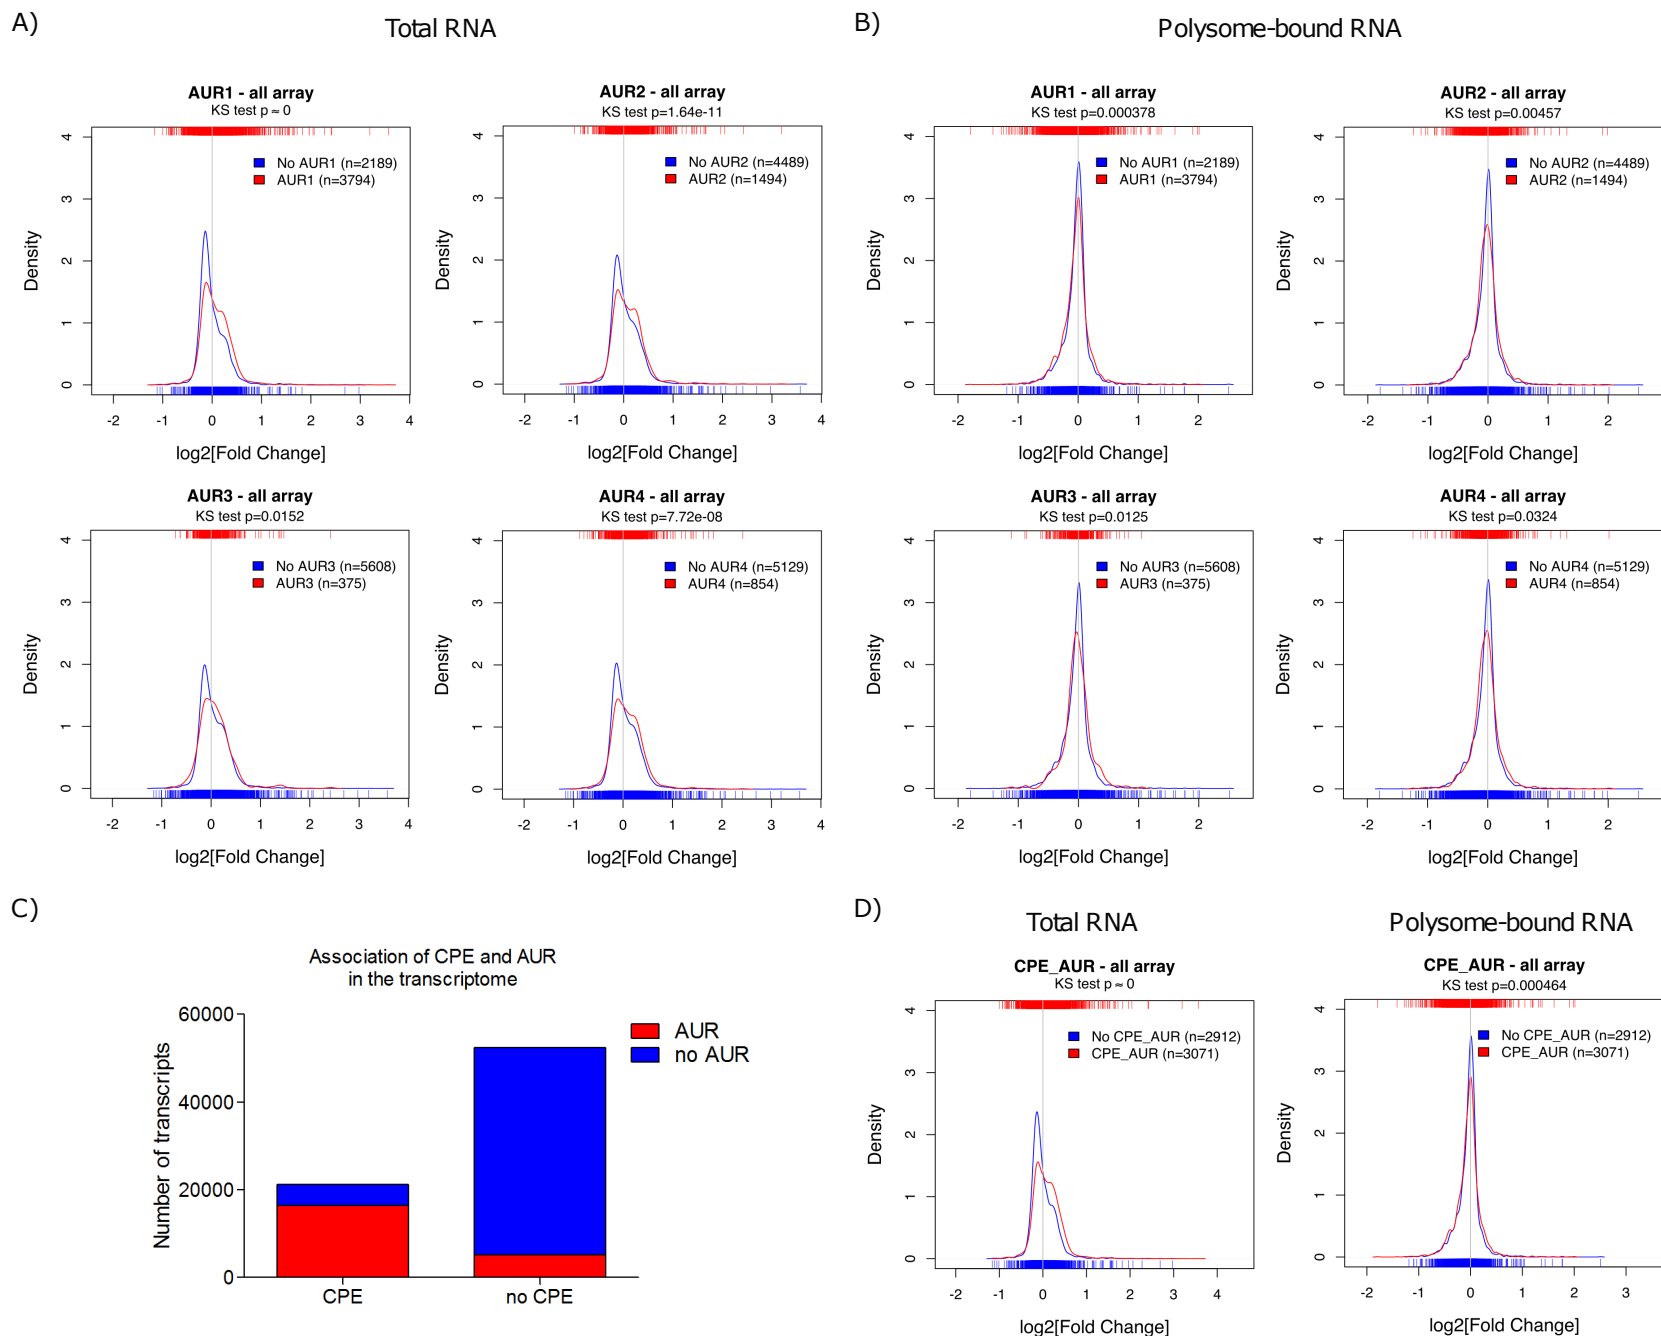

Figure S3: Association of AREs with higher expression changes upon SCI and with CPE.

A-B) Density curves showing distribution of expression changes in total and polysome-bound RNA upon SCI of transcripts containing AREs in the 3' UTR. C) Number of transcripts harbouring CPE and AUR in the whole transcriptome. D) Density curves showing the distribution of expression changes of transcripts containing both AREs and CPE in the 3'UTR in total and polysome-bound RNA upon SCI. Ticks on top and below the plots represent values of  $\log_2$  (fold change) of individual transcripts. Distributions were compared with Kolmogorov-Smirnov test.



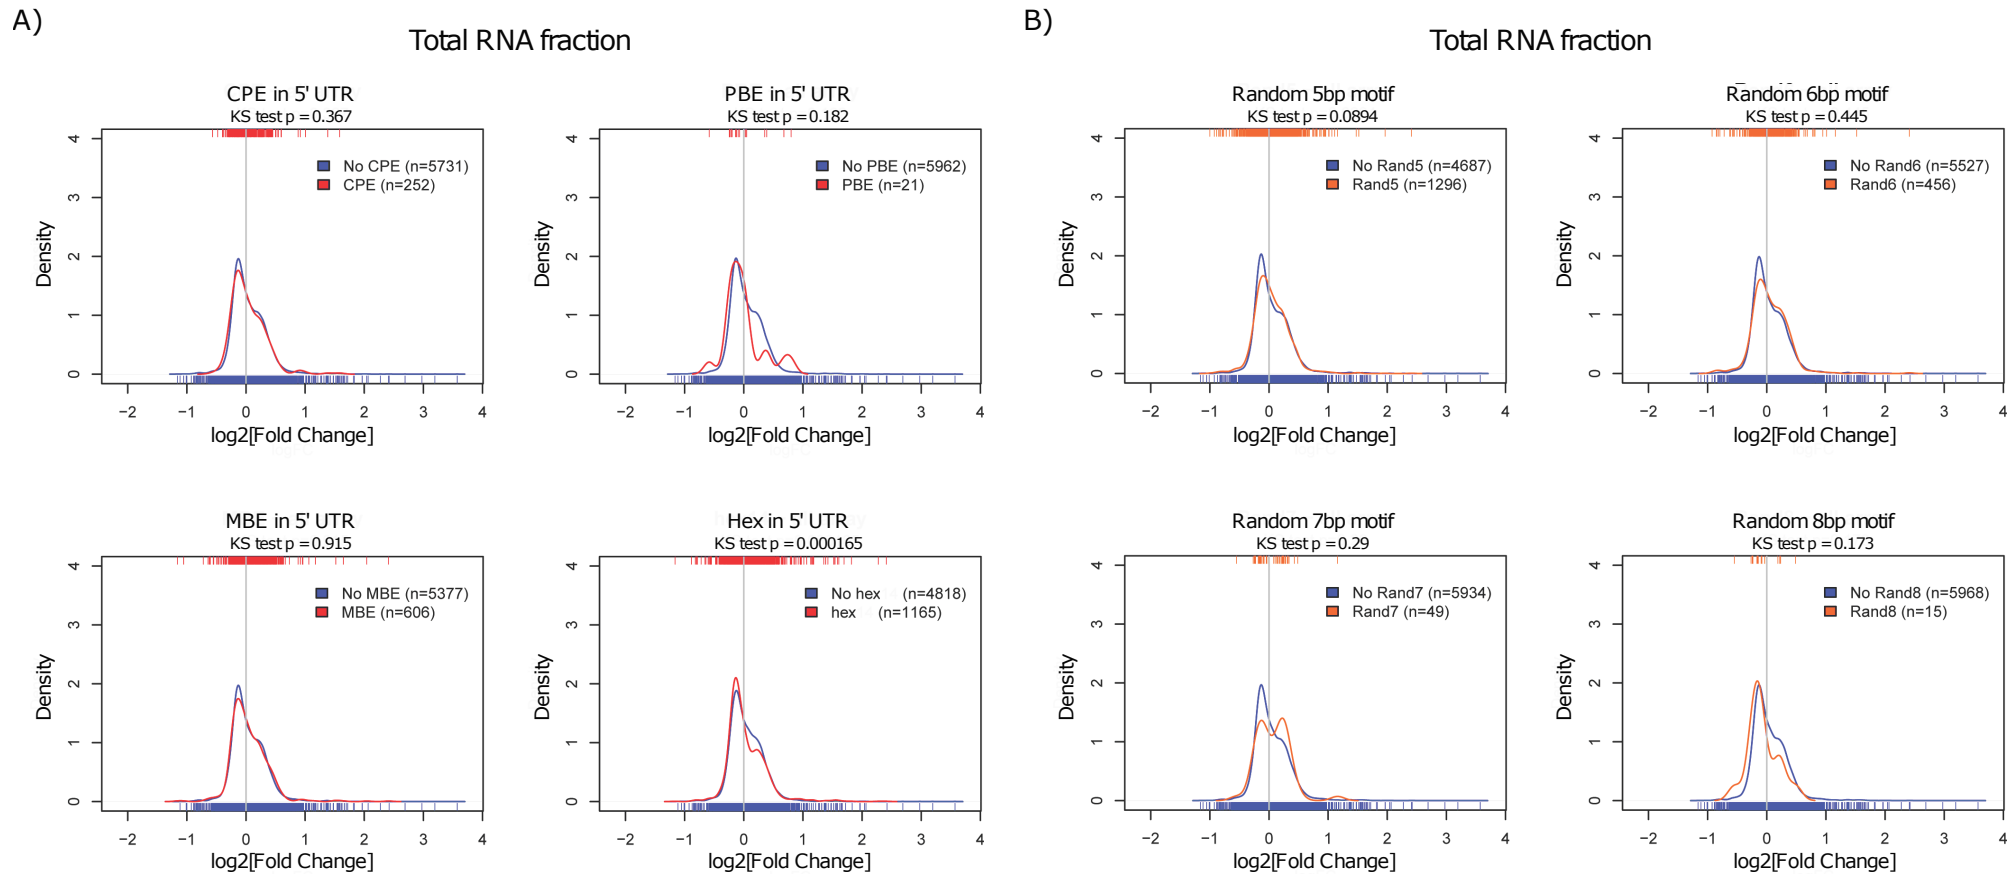

Figure S4: Control analysis for motif analysis.

Substituting the motif analysis with A) the same motifs but in the 5' UTR and B) random motifs shows no association with expression changes.

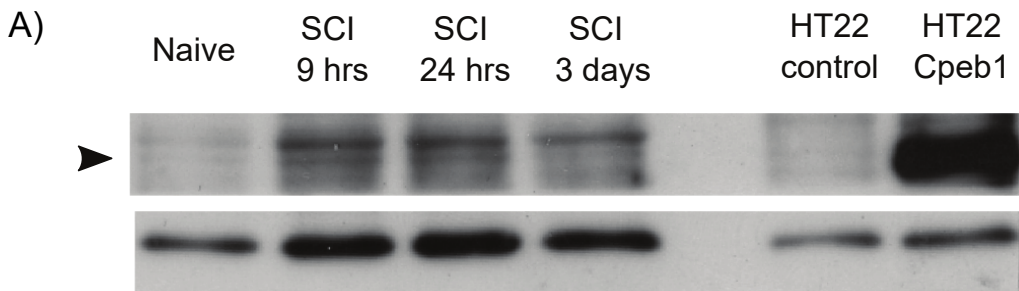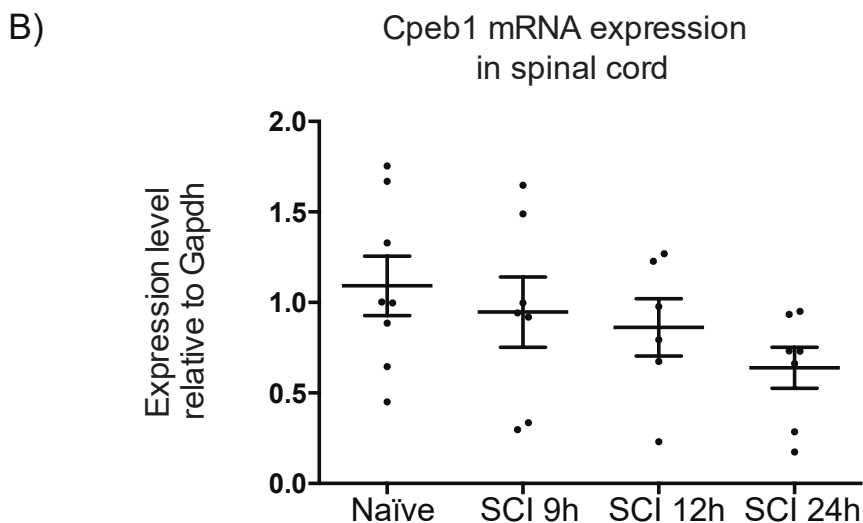

Figure S5: Expression of Cpeb1 detected in injured spinal cords. A) Western blotting of Cpeb1 of naïve and injured spinal cords. Cell lysates of HT22 cells transiently over-expressing Cpeb1 were used as positive control. B) qPCR of naïve and injured spinal cords for Cpeb1. (1-way ANOVA  $p=0.9622$ )

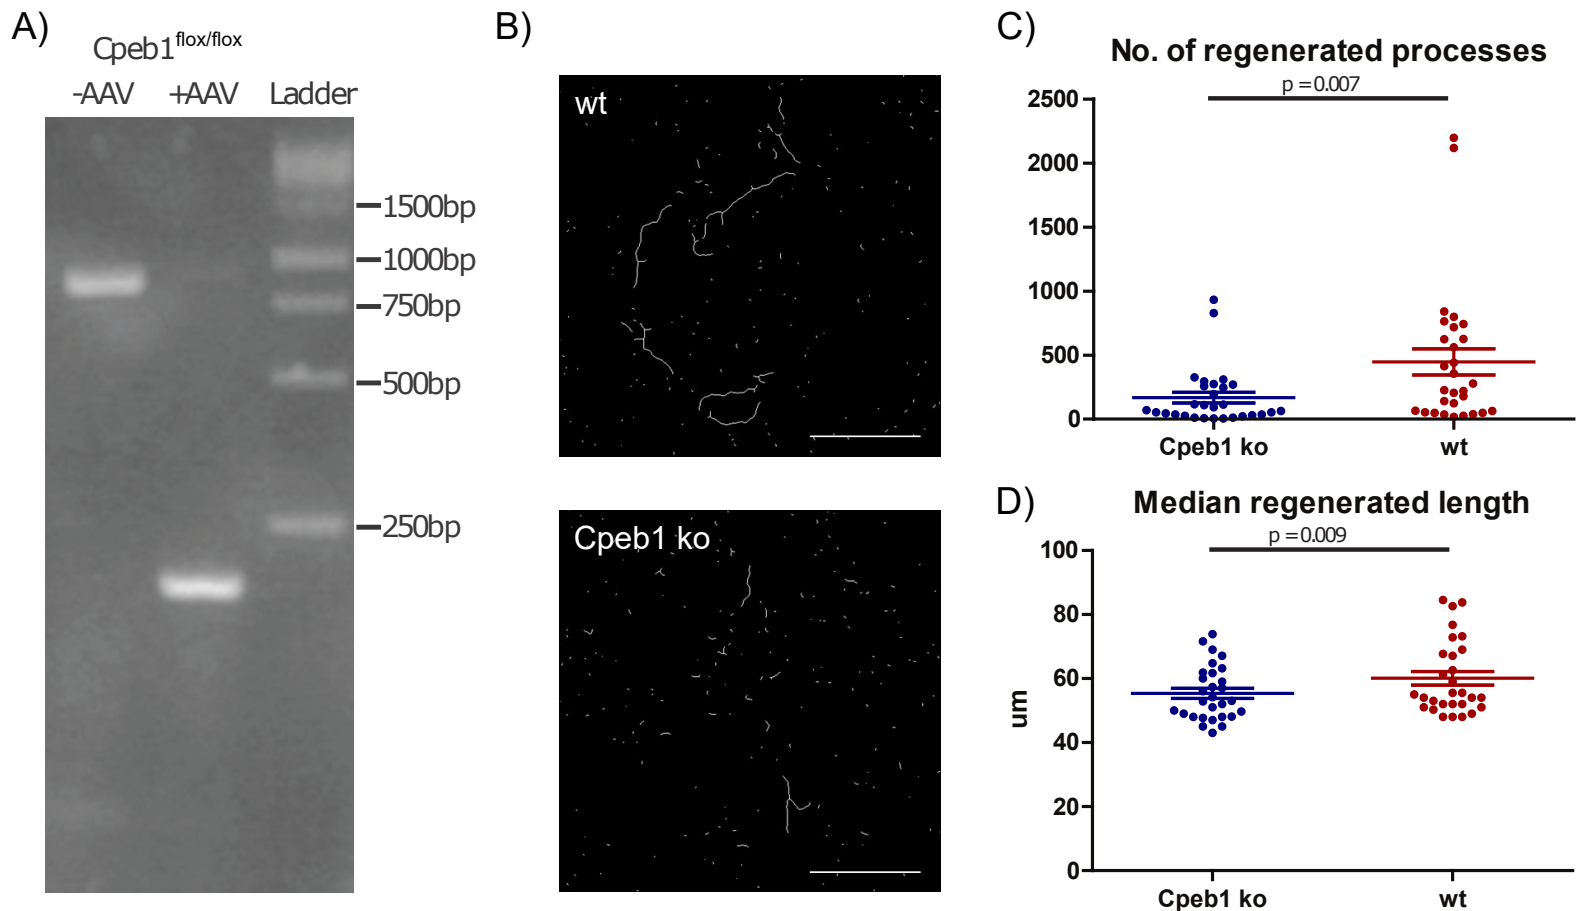

Figure S6: Deletion of *Cpeb1* reduces neurite regeneration in vitro

A) Efficient deletion of *Cpeb1* by AAV-delivered Cre confirmed by PCR. Expected sizes: 884bp (without deletion), 186bp (with deletion). B) Cortical neurons infected with AAV-Cre were seeded on transwell chambers, which exclusively allow neurite growth on the lower side of the membrane. Representative images of neurites skeletonized from image processing. C-D) Quantification of regenerating neurites 24 hours after injury. Each data point represents one culture chamber. A total of 29 culture chambers prepared from 4 mice were used per group. *Cpeb1* ko: *Cpeb1*<sup>flx/flx</sup> + AAV; wt: wild-type + AAV. Scale bars: 100 $\mu\text{m}$ . Error bars: mean  $\pm$  S.E.M.
